1 Effects of Fecal Source Input, Environmental Conditions, and Environmental Sources on  
2 Enterococci Concentrations in a Coastal Ecosystem

3

4 Derek Rothenheber<sup>a#</sup> and Stephen Jones<sup>ab</sup>

5

6 University of New Hampshire, Molecular and Cellular Biomedical Sciences, Durham, New  
7 Hampshire, USA<sup>a</sup>, University of New Hampshire, Department of Natural Resources, Durham,  
8 New Hampshire, USA<sup>b</sup>

9

10 Running Head: Fecal Source Influence on Enterococci Concentrations

11 Key Words: fecal pollution, coastal ecosystem, enterococci, microbial source tracking

12

13

14

15

16

17

18

19 #Address correspondence to Steve Jones, [Stephen.jones@unh.edu](mailto:Stephen.jones@unh.edu)

20

21 **ABSTRACT**

22 Fecal pollution at coastal beaches in the Northeast, USA requires management efforts to address  
23 public health and economic concerns. Concentrations of fecal-borne bacteria are influenced by  
24 different fecal sources, environmental conditions, and ecosystem reservoirs, making their public  
25 health significance convoluted. In this study, we sought to delineate the influences of these  
26 factors on enterococci concentrations in southern Maine coastal recreational waters. Weekly  
27 water samples and water quality measurements were conducted at freshwater, estuarine, and  
28 marine beach sites from June through September 2016. Samples were analyzed for total and  
29 particle-associated enterococci concentrations, total suspended solids, and microbial source  
30 tracking markers for multiple sources. Water, soil, sediment, and marine sediment samples were  
31 also subjected to 16S rRNA sequencing and SourceTracker analysis to determine the influence  
32 from these environmental reservoirs on water sample microbial communities. Enterococci and  
33 particle-associated enterococci concentrations were elevated in freshwater, but suspended solids  
34 concentrations were relatively similar. Mammal fecal contamination was significantly elevated  
35 in the estuary, with human and bird fecal contaminant levels similar between sites. A partial least  
36 squares regression model indicated particle-associated enterococci and mammal marker  
37 concentrations had the most significant positive relationships with enterococci concentrations  
38 across marine, estuary, and freshwater environments. Freshwater microbial communities were  
39 significantly influenced by underlying sediment while estuarine/marine beach communities were  
40 influenced by freshwater, high tide height, and estuarine sediment. We found elevated  
41 enterococci levels are reflective of a combination of increased fecal source input, environmental

42 sources, and environmental conditions, highlighting the need for encompassing MST approaches  
43 for managing water quality issues.

#### 44 **IMPORTANCE**

45 Enterococci have long been the federal standard in determining water quality at estuarine and  
46 marine environments. Although enterococci are highly abundant in the fecal tracts of many  
47 animals they are not exclusive to that environment and can persist and grow outside of fecal  
48 tracts. This presents a management problem for areas that are largely impaired by non-point  
49 source contamination, as fecal sources might not be the root cause of contamination. This study  
50 employed different microbial source tracking methods to delineate influences from fecal source  
51 input, environmental sources, and environmental conditions to determine which combination of  
52 variables are influencing enterococci concentrations in recreational waters at a historically  
53 impaired coastal town. Results showed that fecal source input, environmental sources and  
54 conditions all play a role in influencing enterococci concentrations. This highlights the need to  
55 include an encompassing microbial source tracking approach to assess the effects of all  
56 important variables on enterococci concentrations.

57

#### 58 **INTRODUCTION**

59 Fecal contamination of coastal recreational waters is a significant public health concern, as fecal  
60 material, often from nonpoint sources, can harbor an array of different pathogens. The US EPA  
61 has established regulations based on enterococci bacteria as the indicator of fecal-borne pollution  
62 to help manage water quality at estuarine and marine beaches (1). These organisms correlated  
63 well with predicted public health outcomes in several epidemiological studies that served as the

64 basis for their adoption as the regulatory water quality indicator (2–5). The presence of human  
65 feces can present an elevated public health risk in recreational waters compared to non-human  
66 sources due to the lack of an “inter-species barrier” for diseases and the higher density of human  
67 pathogens that humans can carry (6–8). Although human pollution represents the greatest public  
68 health risk, other fecal sources that contain enterococci and possibly human pathogens can be  
69 chronic or intermittent sources of both, making beach water quality management and  
70 remediation efforts more complex.

71

72 The need to differentiate fecal sources in recreational waters led to the emergence of microbial  
73 source tracking (MST) methods in the early 2000s, most notably the PCR-based assays that  
74 target the 16S rRNA gene in *Bacteroides* spp. (9, 10). There are a wide range of species-specific  
75 genetic markers designed to identify human fecal sources and various domestic and wildlife fecal  
76 sources. These assays have been in use for well over a decade and are supported by numerous  
77 and rigorous laboratory evaluations and field applications (11–17). Initial field studies  
78 investigated the relationship between MST markers and FIB concentrations in recreational  
79 waters to better elucidate potential sources of fecal pollution. Some studies have found strong  
80 relationships between the MST markers and enterococci (12, 18) while other studies have found  
81 either weak or no relationships (19–21), many of which are discussed in a review by Harwood et  
82 al. (22). One main factor affecting the relationship between enterococci and the relative strength  
83 of different sources of fecal contamination is that enterococci can persist and grow in the  
84 environment, which can significantly influence their concentrations in recreational water (23).

85

86 Due to the pervasiveness of enterococci in natural ecosystems, recent studies have been  
87 conducted to not only elucidate environmental parameters controlling their growth, but also to  
88 identify naturalized niches that can act as reservoirs for enterococci and the associated influence  
89 on water quality measurements. Specifically, enterococci have been shown to persist in fresh  
90 water sediments (24–26) and marine sediments (24, 27), and in some cases their relative  
91 concentrations in sediments are several orders of magnitude higher than the overlying water (24,  
92 28–30). In addition, enterococci persist in soils affected by anthropogenic activities (31) as well  
93 as more natural soil environments (32–34). Thus, soil can act as a significant reservoir of  
94 enterococci that can, if eroded, confound concentrations observed in recreational waters.  
95 Evaluating the influence of sediment and or soil on water quality has, in some studies, been  
96 conducted by measuring total suspended solids as a surrogate for sediment-associated  
97 enterococci (27, 35, 36), however this non-specific approach does not indicate the specific type  
98 of source(s) of the suspended solids. With the advent of next generation sequencing, sources of  
99 sediment or soil bacteria can be fingerprinted via 16S rRNA sequencing, and programs like  
100 SourceTracker can then determine relative fractions of source-specific 16S fingerprints within a  
101 water sample (37).

102

103 This study examined the coastal and estuarine beaches of Wells, ME where there has been  
104 historically elevated enterococci levels, as reported by the Maine Healthy Beaches Program (38).  
105 Prior to this study, only a ribotyping-based MST study (39) that also involved other indicator  
106 tracking work had been conducted in this area. In that study, the two major freshwater inputs,  
107 the Webhannet River and Depot Brook were found to be the major influences on water quality  
108 related to an array of fecal contamination sources. To investigate potential sources of enterococci

109 we measured three major categories of variables (fecal source input, environmental conditions,  
110 and environmental sources) and then used a partial least squares regression model approach to  
111 determine the most significant influences on the enterococci concentrations in water samples.

112

## 113 **RESULTS**

### 114 **Total and particle-associated enterococci concentrations and total suspended solids in**

115 **water.** During this study, total enterococci concentrations were highest in freshwater sites, with  
116 concentrations significantly decreasing from there to the estuary and then the marine beach areas  
117 (Figure 2). The geometric mean enterococci concentrations were 197 and 40 CFU/100 ml at the  
118 Depot and Webhannet sites, respectively, with 71% of samples exceeding 104 CFU/100 ml at the  
119 Depot site compared to 21% at the Webhannet site. In contrast, the geometric mean enterococci  
120 concentrations at the other sites were all <15 CFU/100 ml and samples exceeded 104 CFU/100  
121 ml 0% (at Wells Beach) to 25% of the time. In addition to measuring enterococci concentrations  
122 in water samples, particle-associated enterococci and suspended solid concentrations were  
123 measured to better understand the potential mode of transport of these bacteria within this coastal  
124 watershed. Throughout the study period (June-September 2016), levels of total and particle-  
125 associated enterococci varied by site. Concentrations were lowest at the marine beach (Wells  
126 Beach) compared to other sites, with levels significantly higher in all estuary sites (W11-W15)  
127 and freshwater sites (Depot & Webhannet; Figure 2).

128

129 Both total and particle-associated enterococci geometric mean concentrations were statistically  
130 similar at the estuary beach (W11, W12, W13) and estuary (W14, W15) sites. Freshwater sites

131 (Webhannet and Depot) however, had statistically higher enterococci concentrations than other  
132 sites (Figure 2;  $p < 0.05$ ). The ratio of total to particle-associated enterococci varied throughout  
133 the season, with an average of 36.3% ( $SD \pm 30$ ) across all sites. Sites within the estuary beach  
134 showed the highest ratio (41%,  $SD \pm 32$ ), however there were no significant differences observed  
135 between sites or types of sites. Average TSS concentrations were relatively low and similar for  
136 most sites, with an overall average of 2.9 mg TSS/L ( $SD \pm 1.2$ ). The Webhannet freshwater site,  
137 however, had a significantly lower average TSS concentration ( $1.2 \text{ mg/L} \pm 1.0SD$ ,  $p < 0.05$ )  
138 (Figure 2), despite, as previously mentioned, having higher enterococci concentrations. The  
139 relationship between particle-associated enterococci and TSS was not significant ( $r^2 = 0.0011$ ),  
140 and significant rainfall events were seldom and sparse with only one greater than 1 in 48 h prior  
141 to sampling. Overall, this study showed enterococci concentrations were significantly different  
142 by site and were ubiquitously associated with particles, which was independent of suspended  
143 solids concentrations.

144

145 **Presence of fecal sources in fresh, estuarine, and marine waters.** The concentration of fecal  
146 pollution in this study area was determined using both PCR and quantitative PCR MST assays to  
147 identify and quantify predominant sources of fecal contamination present in the water. The  
148 mammal fecal marker (Bac32) was detected via PCR at all sites 100% of the time throughout the  
149 study period. (Supplementary Material 1E). The human fecal marker (HF183) was detected in  
150 51% of all water samples, with the highest detection rate in fresh water (56%) and the lowest  
151 detection rate in marine beach water (46%). Differences in the percent detection of the gull fecal  
152 marker (Gull2) were most pronounced between freshwater (10%) and all other sites (>77%). The  
153 dog fecal marker (DF475) detection rate was highest in the estuary beach water ( $10/44 = 23\%$ ),

154 however 8 of the 10 positive samples were detected in July ( $8/13 = 61\%$ ). For all other sites, an  
155 increase in the detection of dog fecal marker also occurred during July, with 44% (16/36)  
156 detection, compared to 0% for August and September and  $<1\%$  for June. Thus, most of the dog  
157 contamination at all sites was associated with unknown dog-related conditions during July.

158

159 **Concentrations of mammal, human, and bird fecal sources.** We used qPCR to provide  
160 relative quantitative measures of mammal, human and bird fecal contamination levels. Water at  
161 estuary and estuary beach sites contained significantly higher levels of mammal (AllBac) fecal  
162 marker copies, with an average of  $1.54 \times 10^7$  compared to  $2.62 \times 10^6$  in freshwater and  $3.9 \times 10^6$   
163 copies/100 ml in marine beach ( $p < 0.05$ ). Average concentrations of human (HF183) and bird  
164 (GFD) fecal markers were not statistically different between sites, however, concentrations of the  
165 human marker in individual samples varied from 0 -  $2.04 \times 10^4$  copies/100 ml (Figure 3), while  
166 bird fecal marker concentrations were relatively stable across all sites. No significant temporal  
167 trends were observed for any of the quantitative fecal marker levels. Compared with  
168 presence/absence detection of fecal sources, quantitative measurements also did not show strong  
169 spatial patterns, except mammal marker levels showed significant increases at estuary and  
170 estuary beach sites compared to marine and freshwater sites.

171

172 **Differences between water, soil, and sediment bacterial community compositions.** 16S  
173 amplicon sequencing was used to characterize the microbial community present in water and  
174 other sample matrices (soil, sediment, and marine sediment), which was the nexus for ensuing  
175 SourceTracker analysis. A total of 3,276,196 reads and 7,706 unique OTUs were obtained from



176 the 177 samples of fresh, estuary, estuary beach and marine beach water and soil, sediment, and  
177 marine sediment. The number of OTUs assigned and the Shannon diversity index were  
178 significantly higher for soil, sediment, and marine sediment when compared to water samples  
179 (Figure 4,  $p < 0.05$ ). Most taxa in the estuary and marine beach water samples were identified as  
180 Flavobacteriia, Alphaproteobacteria, and Gammaproteobacteria classes, which together  
181 accounted for 84% of the total assigned taxa. Cyanobacteria accounted for 34% of the taxa in  
182 marine sediment, and Betaproteobacteria was one of the top three most abundant taxa in fresh  
183 water, soil and sediment (Figure 4). A Non-Metric Multi-Dimensional Scaling (NMDS)  
184 ordination was used to determine if the bacterial communities from water and other matrices  
185 (soil and sediments) differed based on their taxonomic composition. Bacterial communities from  
186 the marine beach and estuary (All Estuary) waters were similar, but were statistically different  
187 from fresh water (Figure 5,  $p < 0.05$ ). The bacterial communities associated with soil, sediment  
188 and marine sediment were all distinct when compared to each other and water samples,  
189 indicating unique groups of OTUs (Figure 5,  $p < 0.05$ ). Samples taken from different areas  
190 within the watershed (soil, estuarine water, freshwater, etc.) contained unique bacterial  
191 compositions, allowing for downstream analysis with the SourceTracker software to discern  
192 relative contributions of these different communities to the make-up of microbial communities in  
193 the different types of water samples.

194

195 **Environmental source contribution to water samples.** The fraction of freshwater, sediment,  
196 soil, estuarine sediment, and marine beach water source bacterial communities within estuary  
197 and estuary beaches water samples were calculated using the Bayesian mixing model  
198 SourceTracker. Freshwater sample analysis showed a high probability of taxa originating from

199 underlying sediment (74%) and much lower probability of taxa originating from soil (2.6%).  
200 Initial results for the estuary and estuary beach indicated that marine beach water was the  
201 dominant source of bacteria (Table 1). However, given that likely fecal sources are coming from  
202 the watershed, we excluded marine beach water as a potential source and included it as a sink  
203 then re-analyzed the data. These second results showed that freshwater taxa had a high  
204 probability of being a significant fraction of estuary (73%), estuary beach (66%) and marine  
205 beach (35%) water communities, with a significantly higher percentage for the estuary locations  
206 compared to the marine beach (Table 1,  $p < 0.05$ ), which is more influenced by ocean microbial  
207 taxa. Despite the significant percentage of freshwater taxa assignments in the estuary, estuary  
208 beach, and marine beach waters there were no freshwater sediment or soil taxa assignments for  
209 these sites. The data for the percent of unidentifiable taxa showed the opposite trend compared  
210 to percent of assigned freshwater taxa. Unidentifiable taxa in the marine beach were significantly  
211 higher (46%;  $p < 0.05$ ), which is not surprising given that marine beach water community would  
212 likely be most influenced by non-terrestrial sources. Estuarine sediment was the highest likely  
213 identified source in the water from the marine beach site (19%), and it was significantly higher  
214 than percentages calculated for all estuary sites ( $p < 0.05$ ). Overall results showed that freshwater  
215 source-related taxa were a pervasive source throughout the estuary and marine beach, and while  
216 sediment source-related taxa were highly abundant in the freshwater they were not observed  
217 within the estuary or marine beach.

218

219 **Relationships between environmental conditions, fecal source concentrations,**  
220 **environmental sources and enterococci concentrations.** Two PLSR models were created to  
221 determine relationships between enterococci and fecal source concentrations, environmental

222 sources, and environmental conditions (outlined in the Methods). The first ‘freshwater’ PLSR  
223 model indicated particle-associated enterococci concentration, concentration of mammal fecal  
224 marker, TSS concentration, percent of sediment source, percent of unknown source, and salinity  
225 were important variables ( $VIP > 0.8$ ) in resolving variation in enterococci concentrations (Table  
226 1). A one-factor (single PLSR regression) model was deemed optimal (root mean PRESS =  
227 0.735), and showed that all variables (except salinity) had positive associations with enterococci  
228 concentrations. Values for model performance ( $R^2Y = 0.6$ ,  $R^2X = 0.5$ , and  $Q^2 = 0.4$ ) indicated  
229 that the model fit the data moderately well ( $R^2X \geq 0.5$ ) but had poor predictive capability of  
230 enterococci concentrations ( $Q^2 < 0.5$ ; Supplementary Material 3). Out of all the important  
231 variables, particle-associated enterococci (Particle ENT) concentrations showed the strongest  
232 relationship to total enterococci concentrations (Table 2). The second PLSR model, a two-  
233 factor/two PLSR regressions model, was the best fit (root mean PRESS = 0.744) from the PLSR  
234 constructed for the estuary, estuary beach, and marine beach sites. The analysis identified  
235 particle-associated enterococci concentration, mammal fecal source concentration, percent of  
236 freshwater, unidentified and estuarine sediment sources, water temperature, and high tide height  
237 as significantly related to enterococci concentrations. Factor one showed that all variables were  
238 positively associated, except for the percent unidentified and marine sediment sources. The  
239 second factor showed mammal fecal sources, freshwater sources, and water temperatures were  
240 negatively related to enterococci concentrations, which was the opposite of their associations for  
241 factor one. The high tide height and marine sediment were positively related to enterococci  
242 concentrations for factor 2 of the PLSR (Table 2). Together both factors explained 61.8% in the  
243 variation observed in enterococci concentrations, and model performance ( $R^2Y = 0.6$ ,  $R^2X = 0.5$ ,  
244 and  $Q^2 = 0.6$ ) indicated better predictive ability with a similar fit to the data compared to the

245 freshwater model (Supplementary Table 3). Out of all the potential variables measured (19 total)  
246 across three categories (fecal source input, environmental source contribution, and environmental  
247 conditions), particle-associated enterococci and mammal fecal marker concentrations had the  
248 most significant relationships to enterococci concentrations. The relationships between other  
249 variables and enterococci concentrations were specific to freshwater and estuary/marine beach  
250 models, indicating ecosystem specific relationships. However, the joint relationship of particle-  
251 associated and mammal fecal marker across freshwater and estuary/marine environments  
252 indicate their overarching importance in determining enterococci concentrations.

253

#### 254 **4 Discussion:**

255 Geometric mean enterococci concentrations at the marine beach, estuary, and estuary beach  
256 sampling sites were all less than the State of Maine water quality standard of 35 CFU/100 ml and  
257 the majority of concentrations were less than the 104 CFU/100 ml single sample standard,  
258 indicating the water quality was typically considered acceptable for recreational use. Previous  
259 monitoring by the Maine Healthy Beaches Program in 2014 had shown the Wells Beach area  
260 was one of 7 beaches in Maine that had a greater than 20% exceedance rate, with suspicion that  
261 freshwater inputs are a significant source of contamination (38). Our findings confirmed that  
262 enterococci concentrations were statistically higher at both major freshwater tributaries to the  
263 estuary, especially at the Depot Brook site where levels were regularly above the 104 CFU/100  
264 ml single sample standard. The Depot Brook site is located in a watershed with a higher fraction  
265 of developed land (0.27-0.50) and more people per km<sup>2</sup> (325-2,650 people) compared to the  
266 Webhannet site watershed that has a lower developed fraction (0.13-0.25) and 150-325 people  
267 per km<sup>2</sup>; 40). This could help explain the difference in enterococci concentrations between

268 freshwater sites as a more urbanized watershed can increase transport of more pollution from the  
269 watershed to the freshwater tributary. However, the summer of 2016 was especially dry in this  
270 region (41) with just one event with >1 inch of rain (1.73 in., 6/28/16) 48 h prior to the sampling  
271 time. This overall dry condition likely contributed to less fecal contamination transport (via  
272 freshwater discharge) from the watershed to the estuary and marine beach. This suggests that  
273 more typical rainfall conditions would probably have resulted in more freshwater discharge and  
274 higher enterococci concentrations than what we observed.

275

276 Enterococci were significantly associated with suspended particles of >3.0  $\mu\text{m}$  diameter ( $R^2 =$   
277 0.96,  $p < 0.05$ ). On average, 36% (SD  $\pm$  30) of the total enterococci concentrations were  
278 associated with particles, which suggests particles as a potentially important transport  
279 mechanism. Other studies conducted in estuary and storm waters have found similar fractions of  
280 particle associated enterococci, but they noted enterococci demonstrated a preference for a larger  
281 particle size of >30  $\mu\text{m}$  (42–44). The large standard deviation for particle-associated enterococci  
282 could be attributed to the complex nature of particle interactions (sedimentation rate,  
283 electrostatic, hydrophobic, and other surface-surface interactions) and hydrogeological dynamics  
284 (salinity-driven turbidity maximum) (45). The mechanisms underlying enterococci-particle  
285 interactions may also be related to ionic strength in surface waters, as *Enterococcus faecalis* is  
286 negatively charged over a broad pH range (2-8 pH units) and in the presence of different ion  
287 concentrations (46). Results for this study indicate that TSS and particle-associated enterococci  
288 had no linear relationship, indicating particle-associated enterococci were not dependent on the  
289 total amount of suspended material and thus the association is likely due to other factors  
290 influencing cell-particle interactions.

291

292 Quantitative PCR assessment of several fecal sources is a potentially useful strategy to determine  
293 the relative significance of the different sources in a single sample and over time at sites of  
294 interest. PCR detection showed a chronic presence of mammalian fecal source(s) (100% of  
295 samples) with human fecal source(s) detected in approximately half of all samples, so qPCR  
296 analysis is useful for bringing context to the significance of these findings. For example, Mayer  
297 et al. (47) showed that wastewater effluent contains about  $10^8$  copies/100 ml of the AllBac  
298 mammal fecal marker, Sowah et al. (48) found that streams impacted by septic systems could  
299 contain  $10^5 - 10^7$  copies/100 ml depending on the season, and Bushon et al. (49) determined that  
300 under storm flow conditions in an urban watershed mammal marker copy numbers could exceed  
301  $10^8$  copies/100 ml. Results for this study ranged from  $10^5$  to  $8.6 \times 10^7$  copies/100 ml, values that  
302 are within previously reported ranges and likely a concentration reflective of a predominantly  
303 non-urbanized watershed and intermediate mammal source loading. The estuary and estuary  
304 beach area showed a statistically higher concentration of the mammal marker, however, there  
305 was no responsive increase in the concentrations of the human associated fecal marker (HF183),  
306 which may indicate that humans are not the primary mammalian source for the increased fecal  
307 contamination.

308

309 The average concentration of the human marker was 1,500 copies/100 ml across all sites  
310 (geometric mean 167 copies/100 ml), with the highest concentration being 20,364 copies/100ml  
311 (Webhannet 6/22/16). Boehm et al. (50) showed that 4,200 copies/100 ml of HF183 is the cutoff  
312 for where GI illnesses exceed the EPA acceptable risk level of approximately 30/1000 for  
313 swimmers (1). On average, sites in this study did not exceed this benchmark level, however,

314 there were 10 occasions when sites were above the 4,200/100ml threshold (7 different sites  
315 across 4 sampling dates), indicating that sporadic events or conditions can cause elevated human  
316 fecal contamination and potential public health concerns (Supplementary 4). Boehm et al. also  
317 showed that at the LOQ for most assays, 500 copies/100ml or 1000 copies/100ml, there is still a  
318 predicted GI illness of 4 or 8 cases per 1000 swimmers, suggesting positive detection at the LOQ  
319 is indicative of low level health risk (50). For this study, the LOQ was 250 copies/100ml for the  
320 HF183 assay and 67 of 117 samples (57%) tested positive at or above this limit, suggesting that  
321 over half of collected water samples indicated the presence of a low-level health risk. Although  
322 there were no statistical differences between sites for human fecal contamination, W11 did  
323 contain the highest geometric mean (493 copies/100 ml; Supplementary 4). This could be  
324 reflective of the location of the site as it's where drainage from the Webhannet and Depot  
325 watershed meets and is also directly downstream from a boat marina with the harbor sewage  
326 pump station, which could be a possible point source of contamination. Nonetheless, even  
327 though sites on average were below published thresholds, detection of human contamination  
328 even at low concentrations is a concern.

329

330 Although human fecal sources are the greatest public health concern (6, 7, 22, 51) we did not  
331 observe any relationship between human fecal contamination and enterococci concentrations,  
332 suggesting other mammalian fecal sources are more influential in explaining the variation  
333 observed in this study. Interestingly gull fecal sources were detected in 77% or more of the  
334 samples in the estuary and marine beach area, however only 10% of the samples were positive  
335 within the fresh water (Supplementary Material 1), despite there being no decrease in the bird  
336 fecal marker concentration, suggesting the presence of different bird sources in these areas.

337 Anecdotally, Canada geese were observed upstream of both the Webhannet and Depot  
338 freshwater sites periodically throughout the season, which could be a significant source of bird  
339 fecal contamination in the fresh water locations (52).

340

341 One of the unique findings of this study was the relative contribution of different sources to the  
342 bacterial community in the estuarine water. The bacterial community in estuarine water primarily  
343 originated (>90%) from marine beach water, which is not surprising for a well-flushed estuary  
344 like the study site. Because the study period was minimally influenced by rainfall and associated  
345 runoff of freshwater, we expected that the influence of freshwater sources would be low. In  
346 ensuing analyses, we chose not to include marine beach water as a potential source for a variety  
347 of reasons. First, the samples were always collected during low tide before the ebb when the  
348 estuary water was draining and water was moving from the watershed towards the marine beach.  
349 Secondly, we had already shown that the OTU compositions for the marine beach and estuary  
350 samples were very similar, increasing the possibility of a type I error (false positive) for  
351 identifying marine beach as the likely source of enterococci. Lastly, fecal pollution sources most  
352 likely come from the watersheds and not from marine water, so excluding marine beach water  
353 helps to enhance the determination of watershed influences. Our second analysis (marine beach  
354 source excluded) showed that freshwater was a significant source of bacteria to the estuary  
355 (>65% assignment) compared to soil, sediment, and estuarine sediment. This implicates  
356 freshwater as a major conduit for bacterial transport, as well as the major source of enterococci  
357 to the estuary. Overall this finding highlights the importance of freshwater discharge as a  
358 controlling factor in transporting contamination from the watershed to the coast. The specific



359 percent assignment of freshwater source could be an over-estimate, however the trend observed  
360 is a likely scenario given the rationale discussed.

361

362 Analysis of environmental reservoirs of enterococci (soil, sediment, etc.) and their presence  
363 within water samples using SourceTracker revealed a variety of source contributions to  
364 freshwater, estuary and marine waters. To date there have been limited studies using  
365 SourceTracker to identify soil and sediment-associated taxa within water samples, and none of  
366 these studies have focused on a coastal watershed with the potential for freshwater, estuarine and  
367 marine sources. One study conducted in the upper Mississippi River identified up to 14% of  
368 sediment and 1.4% of soil sources of the taxa within the river water (53). This study, however  
369 showed that the sediment source was much more abundant in freshwater (74%), indicating a  
370 greater degree of mixing between the freshwater and underlying sediment communities. The  
371 amount of sediment and soil sources within water samples may be related to site specific  
372 characteristics such as relief or soil texture, which has been shown with TSS fluxes on a global  
373 scale (54). Thus, the degree to which the underlying sediment community mixes with the  
374 overlaying water is likely site specific. Interestingly, even though freshwater contained a  
375 significant amount of sediment source taxa, no sediment source was observed at the estuary and  
376 marine beach sites through the SourceTracker analysis. This difference could indicate that rapid  
377 sedimentation happens during transit to and within the estuary and at the estuarine turbidity  
378 maximum zone (55). TSS concentrations and the ratio of particle-associated to total enterococci  
379 concentrations, however, showed no differences between freshwater and estuary/marine sites.  
380 This could be related to the separate and quite different hydrodynamics within these different  
381 water systems. The percent of sediment source in the freshwater samples observed here might

382 also be an over-estimate/over fit from SourceTracker given the limited number of potential  
383 sources used, but results consistently showed an elevated presence of sediment in all freshwater  
384 samples in this study. SourceTracker analysis also revealed that the freshwater source was  
385 significant (35% or more) in estuary and marine beach water samples, suggesting that fresh  
386 water is a significant conduit for microbial, and fecal contamination, transport from the  
387 watershed to the estuary and marine beach.

388

389 The use of predictive models for water quality has been a focus in the field in parallel with the  
390 adoption of bacterial indicator organisms as the gold standard for water quality determination.  
391 The goal of this research was to identify significant influences on enterococci concentrations by  
392 measuring a wide variety of variables. To distill this information, we used a PLSR model, which  
393 has been shown to out-perform similar multiple linear regression and principle components  
394 regression analyses (56) and has gained popularity in the water quality field (57, 58). Results  
395 from the PLSR analysis in this study showed that particle-associated enterococci and  
396 concentrations of mammal fecal sources were the driving force behind variation in enterococci  
397 concentrations, as described by both PLSR models constructed. Other factors were found to  
398 influence enterococci concentrations, however, these differed between the freshwater and  
399 estuary/marine beach models. For example, TSS concentration as well as the percent of both  
400 freshwater sediment and unknown sources positively influenced enterococci concentrations at  
401 freshwater sites. This indicates that sediment is a likely source of enterococci that influences  
402 concentrations measured in the water. Positive influences from the unidentified source taxa  
403 suggests that there is either an alternative source (not measured in this study) within the  
404 watershed that also influences enterococci concentrations or that SourceTracker could simply not

405 resolve all the potential sources we used. This finding is not surprising given the vast number of  
406 potential sources of fecal pollution within a watershed and that fecal sources were not a part of  
407 the SourceTracker analysis. Results from the estuary and marine beach model returned a two-  
408 factor regression, with each factor essentially being the inverse of each other. Specifically, it  
409 highlighted freshwater being a major conduit for microbial transport to and through the estuary.  
410 Negative influences from the unknown source reaffirms this finding, along with positive  
411 influences from the previous high tide height. The second factor explained approximately 15% of  
412 the variation in enterococci concentration, therefore its importance must be weighed  
413 proportionately to factor one, which explained almost 50% of the variation. However, positive  
414 loadings from previous high tide height and percent of estuarine sediment indicate estuarine  
415 sediment could be a source of enterococci whose influence is dependent on tide height. The  
416 negative loadings from mammal fecal source(s) may indicate that enterococci originating from  
417 the estuarine sediment are not from mammal fecal sources.

418

419 Overall, the results from this study demonstrated that concentrations of enterococci in the coastal  
420 estuarine/marine beach study area were largely controlled by particle-associated enterococci and  
421 mammal fecal source input. The influence of these factors is likely universal across freshwater  
422 and estuarine environments, however other ecosystem factors likely play a role as well. For  
423 freshwater portions of the coastal watershed, sediment may act as a significant enterococci  
424 reservoir that is frequently re-suspended within the water column. Freshwater itself could act as a  
425 major conduit for bacterial transport to an estuary and marine beach area where other  
426 environmental factors (water temperature and high tide height) can influence enterococci  
427 concentrations as well. These findings highlight the dynamic nature of enterococci in natural

428 aquatic ecosystems outside of the mammalian fecal tract, and that concentrations within fresh  
429 water and estuary/marine beach water are influenced by a variety of factors.

430

### 431 **Materials and Methods:**

432 **Site description.** This study was conducted in Wells, Maine, USA (Figure 1). Eight different  
433 sites were used to monitor water quality (n = 2 freshwater, n = 2 estuary, n = 3 estuary beaches, n  
434 = 1 marine beach) as well as twelve soil, twelve fresh-water sediment and four estuarine  
435 sediment sampling sites. Data for air temperature and rainfall amount for the 48 h prior to  
436 sampling were obtained from Weather Underground  
437 (<https://www.wunderground.com/cgi-bin/findweather/getForecast?query=Wells,%20ME>) and  
438 characteristics of tides during sampling were obtained from US Harbors  
439 ([www.meusharbors.com](http://www.meusharbors.com)).

440

441 **Water sampling.** Surface water samples were collected weekly from June to September 2017 (n  
442 = 117). Sampling started two hours before low tide to maximize the potential impacts of  
443 freshwater pollution sources, and samples from all estuary and marine beach sites were collected  
444 before the slack tide. Water samples were collected in autoclaved 1L Nalgene™ Wide-Mouth  
445 Lab Quality PPCO bottles (Thermo Fisher Scientific, Waltham, MA, USA), and environmental  
446 parameters were measured with a YSI Pro2030® dissolved oxygen, conductivity, and salinity  
447 Instrument (YSI Incorporated, Yellow Springs, Ohio, USA). A field replicate was collected at a  
448 different site for each sampling event.

449

450 **Soil, sediment, and marine sediment collection.** Environmental sources were collected twice  
451 throughout the sampling season to build source libraries that were “finger-printed” with 16S  
452 sequencing and SourceTracker analysis. Six soil and sediment samples were collected upstream  
453 of both freshwater sites (Webhannet and Depot; Figure 1). Soil samples were collected at the  
454 crest of the stream embankment, where a 10 x 10 cm a plastic square template was placed down  
455 and all soil (O-horizon) within the template at a 2 cm depth was collected. Samples were sieved  
456 (USA Standard No. 5) to remove any loose-leaf litter and roots to only sample smaller soil  
457 particles and their microbes. Underlying stream sediments were collected using a Van Veen  
458 sediment sampler from depositional sites chosen based on the presence of fine grain sediments.  
459 One grab sample was collected for each site and then the top 2 cm of sediment was subsampled  
460 for analysis. Sediments were sieved (USA Standard No. 45) to remove coarse grain and gravel  
461 size particles. Estuarine sediments were collected during low tide when intertidal sediments were  
462 exposed using the Van Veen sampler, and the top 2 cm were again collected for analysis.

463

464 **Enterococci and total suspended solids quantification.** Total and particle-associated  
465 enterococci were enumerated using the EPA Method 1600 membrane filtration protocol (59) and  
466 particle-associated enterococci were determined via filtration through a 0.47 mm diameter 3.0  
467  $\mu\text{m}$  pore size polycarbonate filter (Millipore™, Darmstadt, Germany) as first reported by Crump  
468 et al. (60). The filters were rolled onto plates containing mEI agar and incubated at  $41^\circ\text{C} \pm$   
469  $0.5^\circ\text{C}$ ; representative colonies were counted in  $24 \pm 2$  hours. Total suspended solids (TSS) were  
470 measured using EPA method 160-2, where 500 ml of the water sample was used to determine  
471 TSS concentrations (61).

472 **DNA extractions.** DNA extraction from all matrices was performed with the PowerSoils® DNA  
473 Extraction Kits (MO BIO Laboratories, Carlsbad, CA, USA), with modifications to the  
474 manufacture's protocol needed to optimize the extraction from water sample filters. For water  
475 samples, 500 ml collected water sample was filtered through 0.47 mm diameter 0.45 µm pore  
476 size polycarbonate filter (Millipore™, Darmstadt, Germany), which was stored in a sterile 2 ml  
477 cryotube at -80°C for at least 24 h. Prior to DNA extraction, frozen filters were crushed into  
478 small pieces with an ethanol sterilized razor blade, a practice commonly used to maximize DNA  
479 recovery (62–64). To minimize additional DNA loss during the extraction process solutions C2  
480 and C3 (from manufacturer's protocol) were halved in volume and combined into a single step.  
481 DNA extraction from soil, freshwater sediment, and marine sediment were conducted per the  
482 manufacture's protocol.

483

484 **Microbial source tracking (MST) PCR and qPCR assays.** MST PCR assays that target  
485 Mammals (Bac32; 65), Humans (HF183; 9), Gulls (Gull2; 66), Dogs (DF475; 10) and  
486 Ruminants (CF128; 9) were used to determine the presence of fecal sources in water samples.  
487 Positive control plasmids were created for each PCR assay from fresh fecal samples that came  
488 from each target organism (Human, Gull, Dog, and Cow). The TOPO™ TA™ Cloning Kit was  
489 used (Invitrogen, Carlsbad, CA, USA), with a blue/white screen of *E. coli* transformants on  
490 kanamycin (50 µg/mL) selective TSA plates. Positive *E. coli* colonies were screened with their  
491 respective PCR assay, and PCR positive colonies were then grown in TSB and extracted with the  
492 PureLink® Quick Plasmid Miniprep Kit (Invitrogen, Carlsbad, CA, USA). PCR assays were run  
493 on a T100™ Thermal Cycler (BioRad, Hercules, CA, USA) with the GoTaq® Green MasterMix  
494 (Promega, Madison, WI, USA). Cycling conditions and amplification protocols for each assay

495 targeted the different source specific markers and followed protocols delineated by different  
496 studies: Bac32 (67) and HF183 (67), CF128 (68), DF475 (69), and Gull2 (66). Quantitative PCR  
497 assays were also run to determine fecal source strength for Mammals (AllBac; 70), Humans  
498 (HF183; 71), and Birds (GFD; 72). All qPCR assays were run on a Mx3000P cycler (Agilent  
499 Technologies, Santa Clara, CA, USA), TaqMan assays used the PerfecCTa<sup>®</sup> FastMix<sup>®</sup> II  
500 (QuantaBio, Beverly, MA, USA) master mix and the SYBR green assay used the FastSYBR<sup>™</sup>  
501 Green Master Mix (Applied Biosystems, Foster City, CA, USA). A standard curve ranging from  
502  $10^6$ - $10^2$  copies (Mammal assay) or  $10^5$ - $10^1$  copies (Human & Bird assay) was also run for each  
503 experimental run with the limit of quantification (LOQ) being 100 copies (Mammal) or 10 copies  
504 (Human & Bird) per PCR. The Ct values, amplification efficiency, slope, and R<sup>2</sup> values for each  
505 standard curve were compared to previously run standard curves, to ensure satisfactory  
506 performance before being used to calculate copy numbers for that run. Each environmental  
507 sample was diluted 1:10 and run in triplicate and the reaction volume (25  $\mu$ l) contained a final  
508 concentration of 0.2 mg/ml BSA. Amplification/cycling conditions were performed per  
509 published protocols for AllBac (73), HF183 (73), and GFD (16). TaqMan assays were run with  
510 an internal amplification control (74) with a down-shift of 1 cycle considered inhibition. Samples  
511 spiked with a plasmid containing  $10^4$  copies of GFD amplicon were used as inhibition controls  
512 for the SYBR assay, with a recovery of less than  $10^4$  copies (100%) considered inhibition. For a  
513 list of primers, probes, and standard curve performance, see Supplementary Material 1.

514

515 **16S library preparation.** The V4 region of the 16S rRNA gene, using the 515F-806R primer-  
516 barcode pairs, was used for amplicon sequencing (75). The Earth Microbiome Project protocol  
517 was used for amplification and pooling of samples, with minor modifications (76). The Qubit<sup>®</sup>

518 dsDNA HS assay was used to quantify sample concentrations, and 500 ng of DNA was pooled  
519 per sample. The pool was then run on a 1.2 % low-melt agarose gel to separate primer-dimers  
520 from acceptable product, and bands between 300-350 bps were cut and extracted as described  
521 above. The final DNA sample was then run on the Agilent Technologies 2200 TapeStation  
522 system (Santa Clara, CA, USA) to determine final size, quality, and purity of sample. Each  
523 library was sent to the Hubbard Center for Genome Studies at the University of New Hampshire  
524 to be sequenced (2 x 250 bp) on the Illumina HiSeq 2500 (San Diego, CA, USA).

525

526 **Quality filtering and Operational Taxonomic Unit (OTU) picking.** QIIME 1.9.1 was used to  
527 perform all major quality filtering, and OTU picking (77). Forward and reversed reads were  
528 quality trimmed ( $\mu$  P25) and removed of Illumina adapters via Trimmomatic (78). Any reads that  
529 were less than 200 bps were discarded, and reads were merged with the QIIME  
530 `joined_paired_ends.py`, using a minimum overlap of 10 bps and a maximum percent difference  
531 of 10%. Paired-end data were analyzed using the QIIME open-reference OTU picking strategy  
532 with UCLUST for *de novo* picking and the Greengenes 13\_8 database (79) for taxonomic  
533 assignment. Alternative OTU picking strategies were also tested to determine best workflow, for  
534 performance of difference strategies refer to Supplementary Material 2. Data for all sequenced  
535 samples are publicly available through NCBI BioProject  
536 (<http://www.ncbi.nlm.nih.gov/bioproject/431501>).

537

538 **SourceTracker analysis.** Samples from 4 source types (fresh water, soil, sediment, and marine  
539 sediment) and 4 sink types (fresh water, estuary water, estuary beach water, and marine beach



540 water) were analyzed by the open-source software SourceTracker v1.0 (37). Default parameters  
541 were used (rarefaction depth 1000, burn-in 100, restart 10, alpha (0.001) and beta (0.01) dirichlet  
542 hyperparameters) in accordance with previously published literature (53, 80). A ‘leave one out’  
543 cross validation was performed to assess the general performance of the model and source  
544 samples were iteratively assigned as sinks to assess how well a known sink would be assigned  
545 (i.e. source = soil and sink = soil). The percent assignments from SourceTracker are the result of  
546 the Gibbs Sampler assigning OTUs from an unknown sample to sources in a random and  
547 iterative fashion, and then calculating likelihood of that OTU originating from said source. The  
548 final output can be interpreted as the percent (or likelihood) of OTUs present in an unknown  
549 sample originating from the sources used in the analysis

550

551 **Partial least squares regression model.** A partial least squares regression (PLSR) model was  
552 used to determine the most important and significant variables affecting enterococci  
553 concentrations (81). Two models were created, one for the estuary, estuary beach, and marine  
554 beach sites, and one for the freshwater sites. Particle-associated enterococci, environment  
555 variables (water temperature, air temperature, dissolved oxygen, salinity, height of previous high  
556 tide, rainfall in previous 48 h), fecal source strength (mammal, human, and bird), and percent of  
557 environmental source (fresh water, soil, sediment, and marine sediment) were used as  
558 explanatory variables for the non-freshwater model. The same parameters, except height of  
559 previous high tide and percent of freshwater source, were used for the freshwater model. All data  
560 except the percent assignments from SourceTracker were  $\log(x+1)$  transformed before  
561 performing the analysis. A KFold cross validation (K=7) with the NIPALS method was used to  
562 determine optimal factors and variable importance ( $VIP > 0.8$ ) for each model. Models were then

563 re-run with only explanatory variables that were determined to be significant. To see model  
564 validation and diagnostic plots, refer to Supplementary Material 3.

565 **Routine statistical analysis and data visualizations.** All routine statistical analyses were  
566 performed in R v3.4.0, Python 3.6.1, or JMP Pro13, while multivariate analyses were performed  
567 with PC-ORD v6. Graphing was performed in IPython notebook with matplotlib, seaborn,  
568 pandas, and numpy packages. All pairwise comparisons were done using the Kruskal-Wallis  
569 nonparametric method, with Dunn's nonparametric multiple comparisons run *post hoc* using a  
570 Bonferroni correction.

571

## 572 **ACKNOWLEDGEMENTS**

573 We would like to thank Meagan Sims and Keri Kaczor at the Maine Healthy Beaches program  
574 and Sean Smith PhD at the University of Maine for their guidance and help with general  
575 knowledge of the Wells, ME area and planning of field sampling. Field work, sample processing,  
576 and molecular work were assisted by Christine Bunyon, Alexandra Bunda, Jackie Lemaire,  
577 Audrey Beresnson, and Joseph Sevigny assisted in optimizing bioinformatic workflows. This  
578 work was funded by the National Science Foundation New Hampshire EPSCoR IIA-1330641  
579 grant.

580

## 581 **REFERENCES**

- 582 1. US Environmental Protection Agency. 2012. Recreational water quality criteria. US  
583 Environ Prot Agency 1–69. [https://www.epa.gov/wqc/2012-recreational-water-quality-](https://www.epa.gov/wqc/2012-recreational-water-quality-criteria)  
584 [criteria](https://www.epa.gov/wqc/2012-recreational-water-quality-criteria)
- 585 2. Cabelli VJ. 1989. Swimming-associated illness and recreational water quality criteria.  
586 *Water Sci Technol* 2:13–21.
- 587 3. Cabelli VJ, Dufour AP, McCabe LJ, Levin MA. 1983. A marine recreational water  
588 quality criterion consistent with indicator concepts and risk analysis. *J Water Pollut*  
589 *Control Fed* 55:1306–1314.
- 590 4. Dufour AP. 1984. Bacterial indicators of recreational water quality. *Can J Public Health*  
591 75:49–56.
- 592 5. Colford JM, Wade TJ, Schiff KC, Wright CC, Griffith JF, Sandhu SK, Burns S, Sobsey  
593 M, Lovelace G, Weisberg SB. 2007. Water quality indicators and the risk of illness at  
594 beaches with nonpoint sources of fecal contamination. *Epidemiology* 18:27–35.  
595 [10.1097/01.ede.0000249425.32990.b9](https://doi.org/10.1097/01.ede.0000249425.32990.b9)
- 596 6. Soller JA, Schoen ME, Bartrand T, Ravenscroft JE, Ashbolt NJ. 2010. Estimated human  
597 health risks from exposure to recreational waters impacted by human and non-human  
598 sources of faecal contamination. *Water Res* 44:4674–4691.  
599 [10.1016/j.watres.2010.06.049](https://doi.org/10.1016/j.watres.2010.06.049).
- 600 7. Soller JA, Schoen ME, Varghese A, Ichida AM, Boehm AB, Eftim S, Ashbolt NJ,  
601 Ravenscroft JE. 2014. Human health risk implications of multiple sources of faecal  
602 indicator bacteria in a recreational waterbody. *Water Res* 66:254–264.  
603 [10.1016/j.watres.2014.08.026](https://doi.org/10.1016/j.watres.2014.08.026) 0043-1354/

- 604 8. World Health Organization. 1999. Health-based monitoring of recreational waters: the  
605 feasibility of a new approach (the "Annapolis Protocol"). World Health Organization -  
606 Geneva 1:1-50. <http://www.who.int/iris/handle/10665/66477>.
- 607 9. Bernhard AE, Field KG. 2000. A PCR assay to discriminate human and ruminant feces  
608 on the basis of host differences in *Bacteroides-Prevotella* genes encoding 16S rRNA.  
609 *Appl Environ Microbiol* 66:4571-4574. 10.1128/AEM.66.10.4571-4574.2000.
- 610 10. Dick LK, Simonich MT, Field KG. 2005. Microplate subtractive hybridization to enrich  
611 for Bacteroidales genetic markers for fecal source identification. *Appl Environ Microbiol*  
612 71:3179–3183. 10.1128/AEM.71.6.3179-3183.2005.
- 613 11. Schriewer A, Goodwin KD, Sinigalliano CD, Cox AM, Wanless D, Bartkowiak J,  
614 Ebentier DL, Hanley KT, Ervin J, Deering LA, Shanks OC, Peed LA, Meijer WG,  
615 Griffith JF, SantoDomingo J, Jay JA, Holden PA, Wuertz S. 2013. Performance  
616 evaluation of canine-associated Bacteroidales assays in a multi-laboratory comparison  
617 study. *Water Res* 47:6909–6920. 10.1016/j.watres.2013.03.062.
- 618 12. Reischer GH, Kavka GG, Kasper DC, Winter C, Mach RL, Farnleitner AH. 2008.  
619 Applicability of DNA based quantitative microbial tracking (QMST) evaluated on a large  
620 scale in the Danube River and its important tributaries. *Large Rivers* 18:117–125.  
621 10.1127/lr/18/2008/117.
- 622 13. Ebentier DL, Hanley KT, Cao Y, Badgley BD, Boehm AB, Ervin JS, Goodwin KD,  
623 Gourmelon M, Griffith JF, Holden PA, Kelty CA, Lozach S, McGee C, Peed LA, Raith  
624 M, Ryu H, Sadowsky MJ, Scott EA, Domingo JS, Schriewer A, Sinigalliano CD, Shanks  
625 OC, Van De Werfhorst LC, Wang D, Wuertz S, Jay JA. 2013. Evaluation of the

- 626 repeatability and reproducibility of a suite of qPCR-based microbial source tracking  
627 methods. *Water Res* 47:6839–6848. 10.1016/j.watres.2013.01.060.
- 628 14. Fremaux B, Gritzfeld J, Boa T, Yost CK. 2009. Evaluation of host-specific Bacteroidales  
629 16S rRNA gene markers as a complementary tool for detecting fecal pollution in a prairie  
630 watershed. *Water Res* 43:4838–4849. 10.1016/j.watres.2009.06.045.
- 631 15. Sinigalliano CD, Ervin JS, Van De Werfhorst LC, Badgley BD, Ballesté E, Bartkowiak J,  
632 Boehm AB, Byappanahalli M, Goodwin KD, Gourmelon M, Griffith J, Holden PA, Jay J,  
633 Layton B, Lee C, Lee J, Meijer WG, Noble R, Raith M, Ryu H, Sadowsky MJ, Schriewer  
634 A, Wang D, Wanless D, Whitman R, Wuertz S, Santo Domingo JW. 2013. Multi-  
635 laboratory evaluations of the performance of *Catellicoccus marimammalium* PCR assays  
636 developed to target gull fecal sources. *Water Res* 47:6883–6896.  
637 10.1016/j.watres.2013.02.059.
- 638 16. Ahmed W, Harwood VJ, Nguyen K, Young S, Hamilton K, Toze S. 2016. Utility of  
639 *Helicobacter* spp. associated GFD markers for detecting avian fecal pollution in natural  
640 waters of two continents. *Water Res* 88:613–622. 10.1016/j.watres.2015.10.050.
- 641 17. Ahmed W, Goonetilleke A, Powell D, Chauhan K, Gardner T. 2009. Comparison of  
642 molecular markers to detect fresh sewage in environmental waters. *Water Res* 43:4908–  
643 4917. 10.1016/j.watres.2009.09.047.
- 644 18. Schriewer A, Miller WA, Byrne BA, Miller MA, Oates S, Conrad PA, Hardin D, Yang  
645 HH, Chouicha N, Melli A, Jessup D, Dominik C, Wuertz S. 2010. Presence of  
646 Bacteroidales as a predictor of pathogens in surface waters of the central California coast.  
647 *Appl Environ Microbiol* 76:5802–5814. 10.1128/AEM.00635-10.

- 648 19. Flood C, Ufnar J, Wang S, Johnson J, Carr M, Ellender R. 2011. Lack of correlation  
649 between enterococcal counts and the presence of human specific fecal markers in  
650 Mississippi creek and coastal waters. *Water Res* 45:872–878.  
651 10.1016/j.watres.2010.09.026.
- 652 20. Shibata T, Solo-Gabriele HM, Sinigalliano CD, Gidley ML, Plano LRW, Fleisher JM,  
653 Wang JD, Elmir SM, He G, Wright ME, Abdelzaher AM, Ortega C, Wanless D, Garza  
654 AC, Kish J, Scott T, Hollenbeck J, Backer LC, Fleming LE. 2010. Evaluation of  
655 conventional and alternative monitoring methods for a recreation marine beach with non-  
656 point source of fecal contamination. *Environ Sci Technol* 44:8175–8181.  
657 10.1021/es100884w.
- 658 21. Santoro AE, Boehm AB. 2007. Frequent occurrence of the human-specific *Bacteroides*  
659 fecal marker at an open coast marine beach: relationship to waves, tides and traditional  
660 indicators. *Environ Microbiol* 9:2038–2049. 10.1111/j.1462-2920.2007.01319.x.
- 661 22. Harwood VJ, Staley C, Badgley BD, Borges K, Korajkic A. 2014. Microbial source  
662 tracking markers for detection of fecal contamination in environmental waters:  
663 Relationships between pathogens and human health outcomes. *FEMS Microbiol Rev*  
664 38:1–40. 10.1111/1574-6976.12031.
- 665 23. Byappanahalli MN, Nevers MB, Korajkic A, Staley ZR, Harwood VJ. 2012. Enterococci  
666 in the environment. *Microbiol Mol Biol Rev* 76:685–706. 10.1128/MMBR.00023-12.
- 667 24. Anderson KL, Whitlock JE, Valerie J, Harwood VJ. 2005. Persistence and differential  
668 survival of fecal indicator bacteria in subtropical waters and sediments. *Appl Environ*  
669 *Microbiol* 71:3041–3048. 10.1128/AEM.71.6.3041–3048.2005.

- 670 25. Haller L, Amedegnato E, Poté J, Wildi W. 2009. Influence of freshwater sediment  
671 characteristics on persistence of fecal indicator bacteria. *Water Air Soil Pollut* 203:217-  
672 227. 10.1007/s11270-009-0005-0.
- 673 26. Badgley BD, Thomas FIM, Harwood VJ. 2010. The effects of submerged aquatic  
674 vegetation on the persistence of environmental populations of *Enterococcus* spp. *Environ*  
675 *Microbiol* 12:1271–1281. 10.1111/j.1462-2920.2010.02169.x.
- 676 27. Jeng HC, Sinclair R, Daniels R, Engle AJ. 2005. Survival of *Enterococci* facalis in  
677 estuarine sediments. *Int J Environ Stud* 62:283–291. 10.1080/0020723042000275132.
- 678 28. Craig DL, Fallowfield HJ, Cromar NJ. 2002. Enumeration of faecal coliforms from  
679 recreational coastal sites: evaluation of techniques for the separation of bacteria from  
680 sediments. *J Appl Microbiol* 93:557–565. 10.1046/j.1365-2672.2002.01730.x.
- 681 29. Ferguson DM, Moore DF, Getrich MA, Zhouwandai MH. 2005. Enumeration and  
682 speciation of enterococci found in marine and intertidal sediments and coastal water in  
683 southern California. *J Appl Microbiol* 99:598–608. 10.1111/j.1365-2672.2005.02660.x.
- 684 30. Niewolak S. 1998. Total viable count and concentration of enteric bacteria in bottom  
685 sediments from the Czarna Hancza River, Northeast Poland. *Polish J Environ Stud*  
686 7:295–306.
- 687 31. Jamieson RC, Gordon RJ, Sharples KE, Stratton GW, Madani A. 2002. Movement and  
688 persistence of fecal bacteria in agricultural soils and subsurface drainage water: a review.  
689 *Can Biosyst Eng* 44:1-9.

- 690 32. Desmarais TR, Solo-Gabriele HM, Carol J, Palmer CJ. 2002. Influence of soil on fecal  
691 indicator organisms in a tidally influenced subtropical environment. *Appl Environ*  
692 *Microbiol* 68:1165–1172. 10.1128/AEM.68.3.1165–1172.2002.
- 693 33. Byappanahalli MN, Roll BM, Fujioka RS. 2012. Evidence for occurrence, persistence,  
694 and growth potential of *Escherichia coli* and Enterococci in Hawaii's soil environments.  
695 *Microbes Environ* 27:164–170. 10.1264/jsme2.ME11305.
- 696 34. Fujioka R, Sian-Denton C, Borja M, Castro J, Morpew K. 1998. Soil: the environmental  
697 source of *Escherichia coli* and Enterococci in Guam's streams. *Environ Toxicol* 6:185-  
698 195.
- 699 35. Jamieson RC, Joy DM, Lee H, Kostaschuk R, Gordon RJ. 2005. Resuspension of  
700 sediment-associated *Escherichia coli* in a natural stream. *J Environ Qual* 34:581–589.  
701 10.2134/jeq2005.0581.
- 702 36. Hathaway JM, Hunt WF. 2011. Evaluation of first flush for indicator bacteria and total  
703 suspended solids in urban stormwater runoff. *Water Air Soil Pollut* 217:135–147.  
704 10.1007/s11270-010-0574-y.
- 705 37. Knights D, Kucyznski J, Charlson, Zaneveld ES, Mozer J, Mozer MC, Collman RG,  
706 Bushman FD, Knight R, Kelley ST. 2013. Bayesian community-wide culture-  
707 independent microbial source tracking. *Nat Methods* 8:761–763. 10.1038/NMETH.1650.
- 708 38. Kaczor K, Sims M. 2014. Maine healthy beaches 2014 Report to US EPA April 1, 2015.  
709 Maine Sea Grant Publications 1-17.  
710 [http://digitalcommons.library.umaine.edu/seagrant\\_pub/41/](http://digitalcommons.library.umaine.edu/seagrant_pub/41/)



- 711 39. Grant-Whiting K, Dalton C, Dillon F. 2003. Microbial source tracking in two southern  
712 Maine watersheds - Webhannet River watershed report. Maine Sea Grant Publications 1-  
713 11. <https://www.seagrant.umaine.edu/extension/microbial-source-tracking>
- 714 40. Roy S, Gerard B, Smith SM, McGreavy B. 2017. A runoff-based vulnerability analysis to  
715 examine and communicate the dynamics of bacteria pollution events in the Gulf of  
716 Maine. Maine Sustainability & Water Conference, 2017 {presentation unpublished}.  
717 [https://umaine.edu/mitchellcenter/2017-conference/h-understanding-managing-land-sea-](https://umaine.edu/mitchellcenter/2017-conference/h-understanding-managing-land-sea-connections-along-maine-coast/)  
718 [connections-along-maine-coast/](https://umaine.edu/mitchellcenter/2017-conference/h-understanding-managing-land-sea-connections-along-maine-coast/)
- 719 41. Piscataqua Region Estuaries Partnership. 2017. State of our estuaries report 2018. PREP  
720 Publications 1-50. <http://scholars.unh.edu/prep/391>
- 721 42. Characklis GW, Dilts MJ, Simmons OD, Likirdopulos CA, Krometis LAH, Sobsey MD.  
722 2005. Microbial partitioning to settleable particles in stormwater. *Water Res* 39:1773–  
723 1782. 10.1016/j.watres.2005.03.004
- 724 43. Mote BL, Turner JW, Lipp EK. 2012. Persistence and growth of the fecal indicator  
725 bacteria enterococci in detritus and natural estuarine plankton communities. *Appl*  
726 *Environ Microbiol* 78:2569–2577. 10.1128/AEM.06902-11.
- 727 44. Boehm AB, Sassoubre LM. 2014. Enterococci as indicators of environmental fecal  
728 contamination. In: enterococci from commensals to lead causes of drug resist infections.  
729 Boston: Massachusetts Eye and Ear Infirmary 1–21.  
730 <https://www.ncbi.nlm.nih.gov/books/NBK190421/>

- 731 45. Talke SA, Swart HE De, Schuttelaars HM. 2009. Feedback between residual circulations  
732 and sediment distribution in highly turbid estuaries: an analytical model. *Cont Shelf Res*  
733 29:119–135. 10.1016/j.csr.2007.09.002
- 734 46. Schinner T, Letzner A, Liedtke S, Castro FD, Eydelnant IA, Tufenkji N. 2010. Transport  
735 of selected bacterial pathogens in agricultural soil and quartz sand. *Water Res* 44:1182–  
736 1192. 10.1016/j.watres.2008.11.038.
- 737 47. Mayer RE, Vierheilig J, Egle L, Reischer GH, Saracevic E, Mach RL, Kirschner AKT,  
738 Zessner M, Sommer R, Farnleitner AH. 2015. Automated sampling procedures supported  
739 by high persistence of bacterial fecal indicators and Bacteroidetes genetic microbial  
740 source tracking markers in municipal wastewater during short-term Storage at 5°C. *Appl*  
741 *Environ Microbiol* 81:5134–5143. 10.1128/AEM.00998-15
- 742 48. Sowah RA, Habteselassie MY, Radcliffe DE, Bauske E, Risse M. 2017. Isolating the  
743 impact of septic systems on fecal pollution in streams of suburban watersheds in Georgia,  
744 United States. *Water Res* 108:330–338. 10.1016/j.watres.2016.11.007
- 745 49. Bushon RN, Brady AMG, Christensen ED, Stelzer EA. 2017. Multi-year microbial  
746 source tracking study characterizing fecal contamination in an urban watershed. *Water*  
747 *Environ Res* 89:127-143. 10.2175/106143016X14798353399412
- 748 50. Boehm AB, Soller JA, Shanks OC. 2015. Human-associated fecal quantitative  
749 polymerase chain reaction measurements and simulated risk of gastrointestinal illness in  
750 recreational waters contaminated with raw sewage. *Environ Sci Technol Lett* 2:270–275.  
751 10.1021/acs.estlett.5b00219

- 752 51. Wong M, Kumar L, Jenkins TM, Xagorarakis I, Phanikumar MS, Rose JB. 2009.  
753 Evaluation of public health risks at recreational beaches in Lake Michigan via detection  
754 of enteric viruses and a human-specific bacteriological marker. *Water Res* 43:1137–1149.  
755 10.1016/j.watres.2008.11.051
- 756 52. Green HC, Dick LK, Gilpin B, Samadpour M, Field KG. 2012. Genetic markers for rapid  
757 PCR-based identification of gull, Canada goose, duck, and chicken fecal contamination in  
758 water. *Appl Environ Microbiol* 78:503–510. 10.1128/AEM.05734-11
- 759 53. Staley C, Gould TJ, Wang P, Phillips J, Cotner JB, Sadowsky MJ. 2016. Sediments and  
760 soils act as reservoirs for taxonomic and functional bacterial diversity in the upper  
761 Mississippi River. *Microb Ecol* 71:814-824. 10.1007/s00248-016-0729-5
- 762 54. Meybeck M, Laroche L, Dürr HH, Syvitski JPM. 2003. Global variability of daily total  
763 suspended solids and their fluxes in rivers. *Glob Planet Change* 39:65–93.  
764 10.1016/S0921-8181(03)00018-3
- 765 55. Orton PM, Kineke GC. 2001. Comparing calculated and observed vertical suspended-  
766 sediment distributions from a Hudson River estuary turbidity maximum. *Estuar Coast*  
767 *Shelf Sci* 52:401–410. 10.1006/ecss.2000.0747
- 768 56. Carrascal LM, Galván I, Gordo O. 2009. Partial least squares regression as an alternative  
769 to current regression methods used in ecology. *Oikos* 118:681–690. 10.1111/j.1600-  
770 0706.2008.16881.x
- 771 57. Thoe W, Gold M, Griesbach A, Grimmer M, Taggart ML, Boehm AB. 2014. Predicting  
772 water quality at Santa Monica Beach: evaluation of five different models for public

- 773 notification of unsafe swimming conditions. *Water Res* 67:105–117.  
774 10.1016/j.watres.2014.09.001
- 775 58. Brooks WR, Fienen MN, Corsi SR. 2013. Partial least squares for efficient models of  
776 fecal indicator bacteria on Great Lakes beaches. *J Environ Manage* 114:470–475.  
777 10.1016/j.jenvman.2012.09.033
- 778 59. Messer JW, Dufour AP. 2002. Method 1600: Enterococci in water by membrane  
779 filtration using membrane-Enterococcus indoxyl- $\beta$ -D-glucoside agar (mEI). US Environ  
780 Prot Agency 1-42.
- 781 60. Crump BC, Baross JA, Simenstad CA. 1998. Dominance of particle-attached bacteria in  
782 the Columbia River estuary, USA. *Aquat Microb Ecol* 14:7–18. 10.3354/ame014007.
- 783 61. US Environmental Protection Agency. 1983. Methods for chemical analysis of water and  
784 wastes - method 160.2 (gravimetric, dried at 103-105°C). US Environ Prot Agency 59-  
785 61.
- 786 62. Sauer EP, Vandewalle JL, Bootsma MJ, McLellan SL. 2011. Detection of the human  
787 specific *Bacteroides* genetic marker provides evidence of widespread sewage  
788 contamination of stormwater in the urban environment. *Water Res* 45:4081–4091.  
789 10.1016/j.watres.2011.04.049.
- 790 63. Cloutier DD, Alm EW, McLellan SL. 2015. The influence of land-use, nutrients, and  
791 geography on microbial communities and fecal indicator abundance at Lake Michigan  
792 beaches. *Appl Environ Microbiol* 81:4904-4913. 10.1128/AEM.00233-15.

- 793 64. Newton RJ, Bootsma MJ, Morrison HG, Sogin ML, McLellan SL. 2013. A microbial  
794 signature approach to identify fecal pollution in the waters off an urbanized coast of Lake  
795 Michigan. *Microb Ecol* 65:1011–1023. 10.1007/s00248-013-0200-9.
- 796 65. Bernhard AE, Field KG. 2000. Identification of nonpoint sources of fecal pollution in  
797 coastal waters by using host-specific 16S ribosomal DNA genetic markers from fecal  
798 anaerobes. *Appl Environ Microbiol* 66:1587–1594. 10.1128/AEM.66.4.1587-1594.2000.
- 799 66. Lu J, Santo Domingo JW, Lamendella R, Edge T, Hill S. 2008. Phylogenetic diversity  
800 and molecular detection of bacteria in gull feces. *Appl Environ Microbiol* 74:3969-3976.  
801 10.1128/AEM.00019-08.
- 802 67. Harwood VJ, Brownell M, Wang S, Lepo J, Ellender RD, Ajidahun A, Hellein KN,  
803 Kennedy E, Ye X, Flood C. 2009. Validation and field testing of library-independent  
804 microbial source tracking methods in the Gulf of Mexico. *Water Res* 43:4812–4819.  
805 10.1016/j.watres.2009.06.029.
- 806 68. Shanks OC, Nietch C, Simonich M, Younger M, Reynolds D, Field KG. 2006. Basin-  
807 wide analysis of the dynamics of fecal contamination and fecal source identification in  
808 Tillamook Bay, Oregon. *Appl Environ Microbiol* 72:5537-5536. 10.1128/AEM.03059-05
- 809 69. Jokinen CC, Schreier H, Mauro W, Taboada E, Isaac-Renton JL, Topp E, Edge T,  
810 Thomas JE, Gannon VPJ. 2010. The occurrence and sources of *Campylobacter* spp.,  
811 *Salmonella enterica* and *Escherichia coli* O157:H7 in the Salmon River, British  
812 Columbia, Canada. *J Water Health* 8:374–386. 10.2166/wh.2009.076.
- 813 70. Layton A, McKay L, Williams D, Garrett V, Gentry R, Sayler G. 2006. Development of  
814 *Bacteroides* 16S rRNA gene taqman-based real-time PCR assays for estimation of total,

- 815 human, and bovine fecal pollution in water. *Appl Environ Microbiol* 72:4214–4224.  
816 10.1128/AEM.01036-05.
- 817 71. Converse RR, Blackwood AD, Kirs M, Griffith JF, Noble RT. 2009. Rapid QPCR-based  
818 assay for fecal *Bacteroides* spp. as a tool for assessing fecal contamination in recreational  
819 waters. *Water Res* 43:4828–4837. 10.1016/j.watres.2009.06.036.
- 820 72. Green HC, Dick LK, Gilpin B, Samadpour M, Field KG. 2012. Genetic markers for rapid  
821 PCR-based identification of gull, Canada goose, duck, and chicken fecal contamination in  
822 water. *Appl Environ Microbiol* 78:503–510. 10.1128/AEM.05734-11
- 823 73. Haugland RA, Varma M, Sivaganesan M, Kelty C, Peed L, Shanks OC. 2010. Evaluation  
824 of genetic markers from the 16S rRNA gene V2 region for use in quantitative detection  
825 of selected *Bacteroidales* species and human fecal waste by qPCR. *Syst Appl Microbiol*  
826 33:348-357. 10.1016/j.syapm.2010.06.001.
- 827 74. Nordstrom JL, Vickery MCL, Blackstone GM, Murray SL, DePaola A. 2007.  
828 Development of a multiplex real-time PCR assay with an internal amplification control  
829 for the detection of total and pathogenic *Vibrio parahaemolyticus* bacteria in oysters.  
830 *Appl Environ Microbiol* 73:5840–5847. 10.1128/AEM.00460-07.
- 831 75. Caporaso JG, Lauber CL, Walters WA, Berg-Lyons D, Lozupone CA, Turnbaugh PJ,  
832 Fierer N, Knight R. 2011. Global patterns of 16S rRNA diversity at a depth of millions of  
833 sequences per sample. *Proc Natl Acad Sci U S A* 108:4516–4522.  
834 10.1073/pnas.1000080107.
- 835 76. Caporaso JG, Lauber CL, Walters WA, Berg-Lyons D, Huntley J, Fierer N, Owens SM,  
836 Betley J, Fraser L, Bauer M, Gormley N, Gilbert JA, Smith G, Knight R. 2012. Ultra-

- 837 high-throughput microbial community analysis on the Illumina HiSeq and MiSeq  
838 platforms. *ISME J* 6:1621–1624. [10.1038/ismej.2012.8](https://doi.org/10.1038/ismej.2012.8).
- 839 77. Caporaso JG, Kuczynski J, Stombaugh J, Bittinger K, Bushman FD, Costello EK, Fierer  
840 N, Gonzalez Pena A, Goodrich JK, Gordon JI, Huttley GA, Kelley ST, Knights D,  
841 Koenig JE, Ley RE, Lozupone CA, McDonald D, Muegge BD, Pirrung M, Reeder J,  
842 Sevinsky JR, Turn KR. 2010. QIIME allows analysis of high-throughput community  
843 sequencing data. *Nat Methods* 5:335–336. doi:10.1038/nmeth.f.303.
- 844 78. Bolger AM, Lohse M, Usadel B. 2014. Genome analysis Trimmomatic : a flexible  
845 trimmer for Illumina sequence data. *Bioinformatics* 30:2114–2120.  
846 [10.1093/bioinformatics/btu170](https://doi.org/10.1093/bioinformatics/btu170)
- 847 79. DeSantis TZ, Hugenholtz P, Larsen N, Rojas M, Brodie EL, Keller K, Huber T, Dalevi  
848 D, Hu P, Andersen GL. 2006. Greengenes, a chimera-checked 16S rRNA gene database  
849 and workbench compatible with ARB. *Appl Environ Microbiol* 72:5069–5072.  
850 [10.1128/AEM.03006-05](https://doi.org/10.1128/AEM.03006-05)
- 851 80. Henry R, Schang C, Coutts S, Kolotelo P, Prosser T, Crosbie N, Grant T, Cottam D,  
852 O’Brien P, Deletic A. 2016. Into the deep: Evaluation of SourceTracker for assessment of  
853 faecal contamination of coastal waters. *Water Res* 93:242-253.  
854 [10.1016/j.watres.2016.02.029](https://doi.org/10.1016/j.watres.2016.02.029)
- 855 81. Helland IS. 1990. Partial least squares regression and statistical models. *Scand Stat*  
856 *Theory Appl* 17:97–114. <http://www.jstor.org/stable/4616159>.
- 857

858 **Tables**

Environmental Microbial Community Source (Including Marine Beach Source)

| <b>Water Sample Type</b> | <b>Marine Beach</b> | <b>Freshwater</b> | <b>Estuarine Sediment</b> | <b>Sediment</b> | <b>Soil</b> |
|--------------------------|---------------------|-------------------|---------------------------|-----------------|-------------|
| <b>Estuary Beach</b>     | 97%                 | <0.01%            | 0.4%                      | <0.01%          | <0.01%      |
| <b>Estuary</b>           | 94%                 | 2.9%              | 0.2%                      | 0.02%           | <0.01%      |
| <b>Freshwater</b>        | <0.01%              | N/A               | <0.01%                    | 74%             | 2.6%        |

Environmental Microbial Community Source (Excluding Marine Beach Source)

| <b>Water Sample Type</b> | <b>Marine Beach</b> | <b>Freshwater</b> | <b>Estuarine Sediment</b> | <b>Sediment</b> | <b>Soil</b> |
|--------------------------|---------------------|-------------------|---------------------------|-----------------|-------------|
| <b>Estuary Beach</b>     | N/A                 | 66%               | 12%                       | <0.01%          | <0.01%      |
| <b>Estuary</b>           | N/A                 | 74%               | 7.6%                      | 0.02%           | <0.01%      |
| <b>Marine Beach</b>      | N/A                 | 35%               | 19%                       | <0.01%          | <0.01%      |
| <b>Freshwater</b>        | N/A                 | N/A               | 0%                        | 74%             | 2.6%        |

859

860 **Table 1. The relative contribution of different sources to the microbial communities in**  
861 **estuarine and marine water.** SourceTracker was run with two different configurations, one  
862 where Marine Beach water was included as a potential source (top) and a second run where  
863 Marine Beach water was excluded as a potential source (bottom).

864

865

866

867



| Freshwater          |         | Estuary, Estuary Beach & Marine Beach |         |                          |         |
|---------------------|---------|---------------------------------------|---------|--------------------------|---------|
| PLSR 1              |         | PLSR 1                                |         | PLSR 2                   |         |
| X Variable          | Loading | X Variable                            | Loading | X Variable               | Loading |
| Particle ENT        | 0.501   | Particle ENT                          | 0.456   | Particle ENT             | 0.420   |
| qPCR Mammal         | 0.352   | qPCR Mammal                           | 0.438   | qPCR Mammal              | -0.337  |
| TSS                 | 0.408   | % Freshwater                          | 0.408   | % Freshwater             | -0.418  |
| % Sediment          | 0.336   | % Unknown                             | -0.457  | % Unknown                | 0.389   |
| % Unknown           | 0.476   | Water Temp<br>(C)                     | 0.302   | Water Temp<br>(C)        | -0.123  |
| Salinity            | -0.344  | Hightide (ft)                         | 0.170   | Hightide (ft)            | 0.456   |
|                     |         | % Estuarine<br>Sediment               | -0.294  | % Estuarine<br>Sediment  | 0.401   |
| Total Y<br>Variance | 60.1%   | Total Y<br>Variance                   | 47.2%   | Cumulative Y<br>Variance | 61.8%   |

868

869 **Table 2. Most Significant Relationships/Contributions for All Factors to Enterococci**

870 **Concentrations. Shown is the output from a partial least squares regression for a**

871 **freshwater and estuary/marine model.** All variables shown have significant relationships for

872 each model (VIP > 0.8), and loadings are derived from re-running models with only variables

873 deemed significant. Model loadings are specific weights on a multivariate regression axis,

874 positive and negative loadings refer to positive or negative relationships to enterococci

875 concentrations. Negative loadings in the model are designated with a – before the number.

876

877

878

879 **Figure Legends**

880 **Figure 1: Wells Maine Study area and sampling sites.** All water collection sites are marked  
881 with a dark grey circle. Sites that correspond to fresh water are indicated with a (1), estuary (2),  
882 estuary beach (3), and marine beach (4).

883

884 **Figure 2: Geometric Mean Concentrations of Total and Particle Associated Enterococci**  
885 **and Average Total Suspended Solids Concentrations at the Eight Study Sites.** (A) Total  
886 enterococci concentrations are represented with the blue bar, and particle associated enterococci  
887 concentrations correspond to the green bar. Error bars are derived from variation from each site  
888 across the entire study. (B) Violin plots were used to represent TSS concentrations, and the color  
889 corresponds to the type of site including marine beach (red), estuary beach (purple), estuary  
890 (green), or fresh water (blue). Horizontal lines go through the median of each violin plot.

891

892 **Figure 3: Relative Levels of Mammal, Human, and Bird Fecal Source at the Different**  
893 **Types of Study Sites.** Box plots represent levels of microbial source tracking markers at marine  
894 beach (Wells Beach), estuary beach (W11, W12, W13), estuary (W14 & W15), and fresh water  
895 (Webhannet & Depot). Outlier data are represented with a black diamond.

896

897 **Figure 4: 16S Taxa Profiles and the Top Three Most Abundant Bacterial Classes in All**  
898 **Source and Sink Samples.** Stacked bar plots represent percentages of the class level  
899 composition of the microbial communities. Source corresponds to environmental sources that

900 were finger-printed with the SourceTracker program, and then used to determine their presence  
901 within water (sink) samples. The table represents the top three classes for each group of samples  
902 and \* corresponds to phylum level. For a complete list of all taxa assignments refer to  
903 Supplementary material 4.

904

905 **Figure 5. Differences Between Microbial Communities from Different Source Materials.**

906 Samples are color-coded based on sample matrix (i.e. soil, fresh water, etc.). Percent of variation  
907 explained are displayed on the x and y axis and the minimum stress of the ordination is shown in  
908 the top left corner.

909

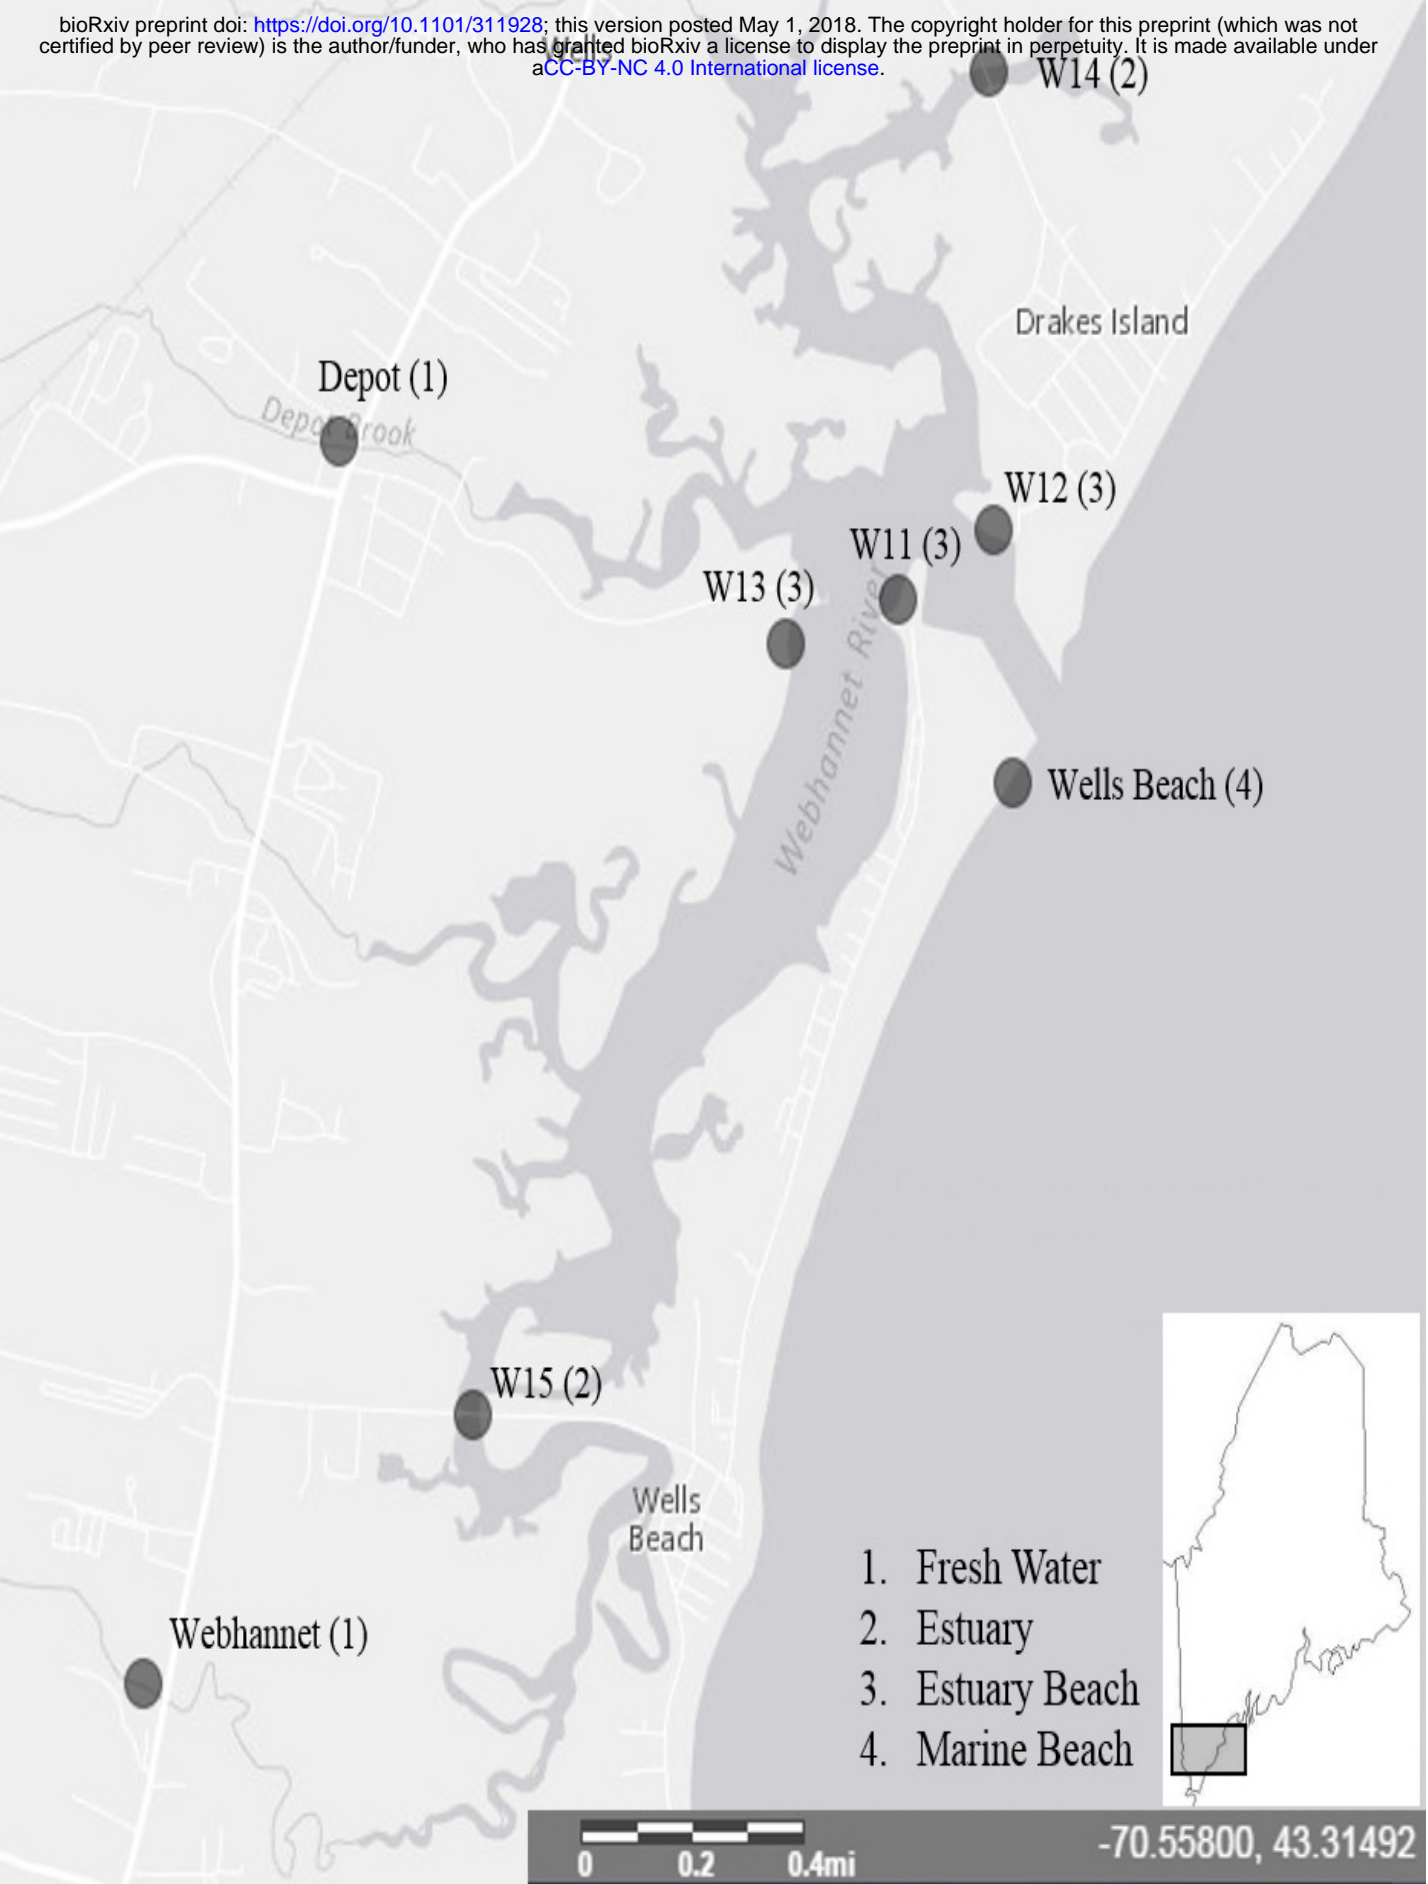

Figure 1: Wells Maine Study area and sampling sites. All water collection sites are marked with a dark grey circle. Sites that correspond to fresh water are indicated with a (1), estuary (2), estuary beach (3), and marine beach (4).

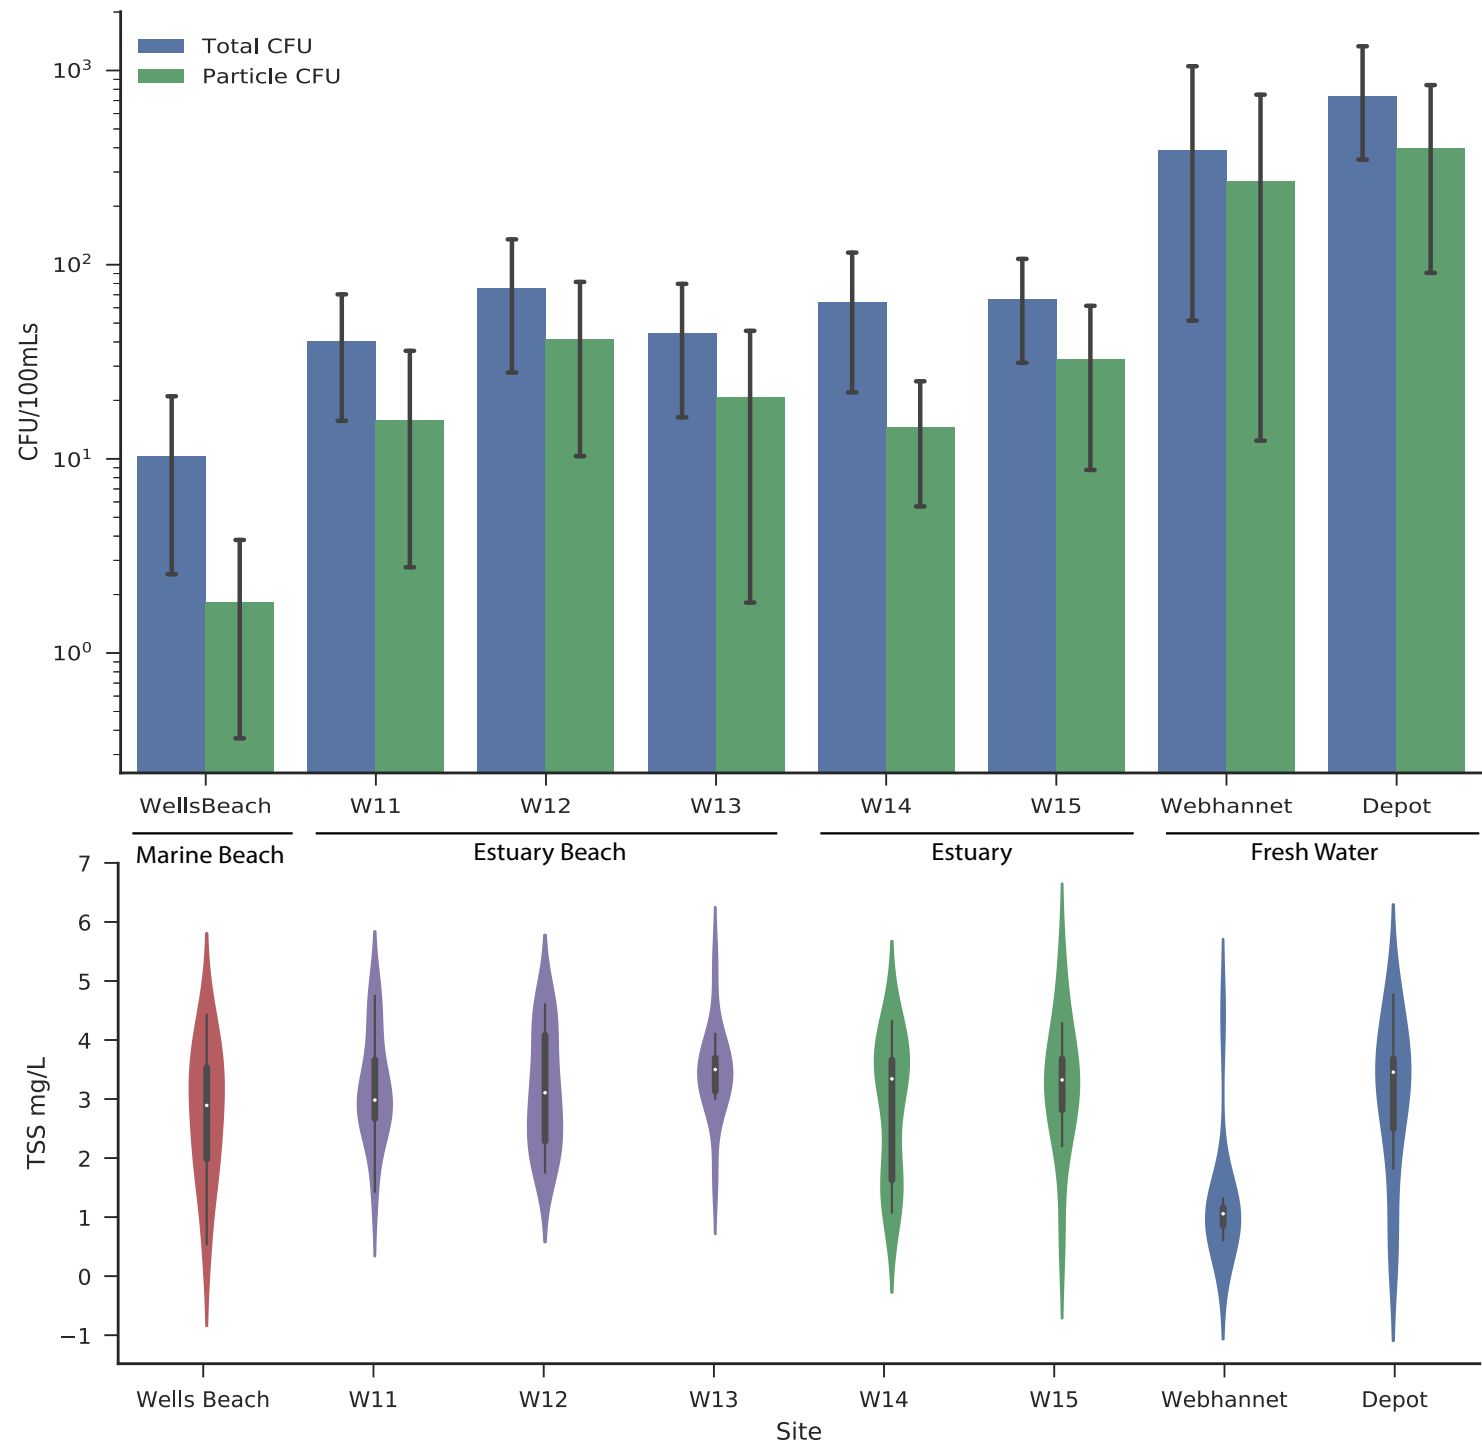

Figure 2: Geometric Mean Concentrations of Total and Particle Associated Enterococci and Average Total Suspended Solids Concentrations at the Eight Study Sites. (A) Total enterococci concentrations are represented with the blue bar, and particle associated enterococci concentrations correspond to the green bar. Error bars are derived from variation from each site across the entire study. (B) Violin plots were used to represent TSS concentrations, and the color corresponds to the type of site including marine beach (red), estuary beach (purple), estuary (green), or fresh water (blue). Horizontal lines go through the median of each violin plot.

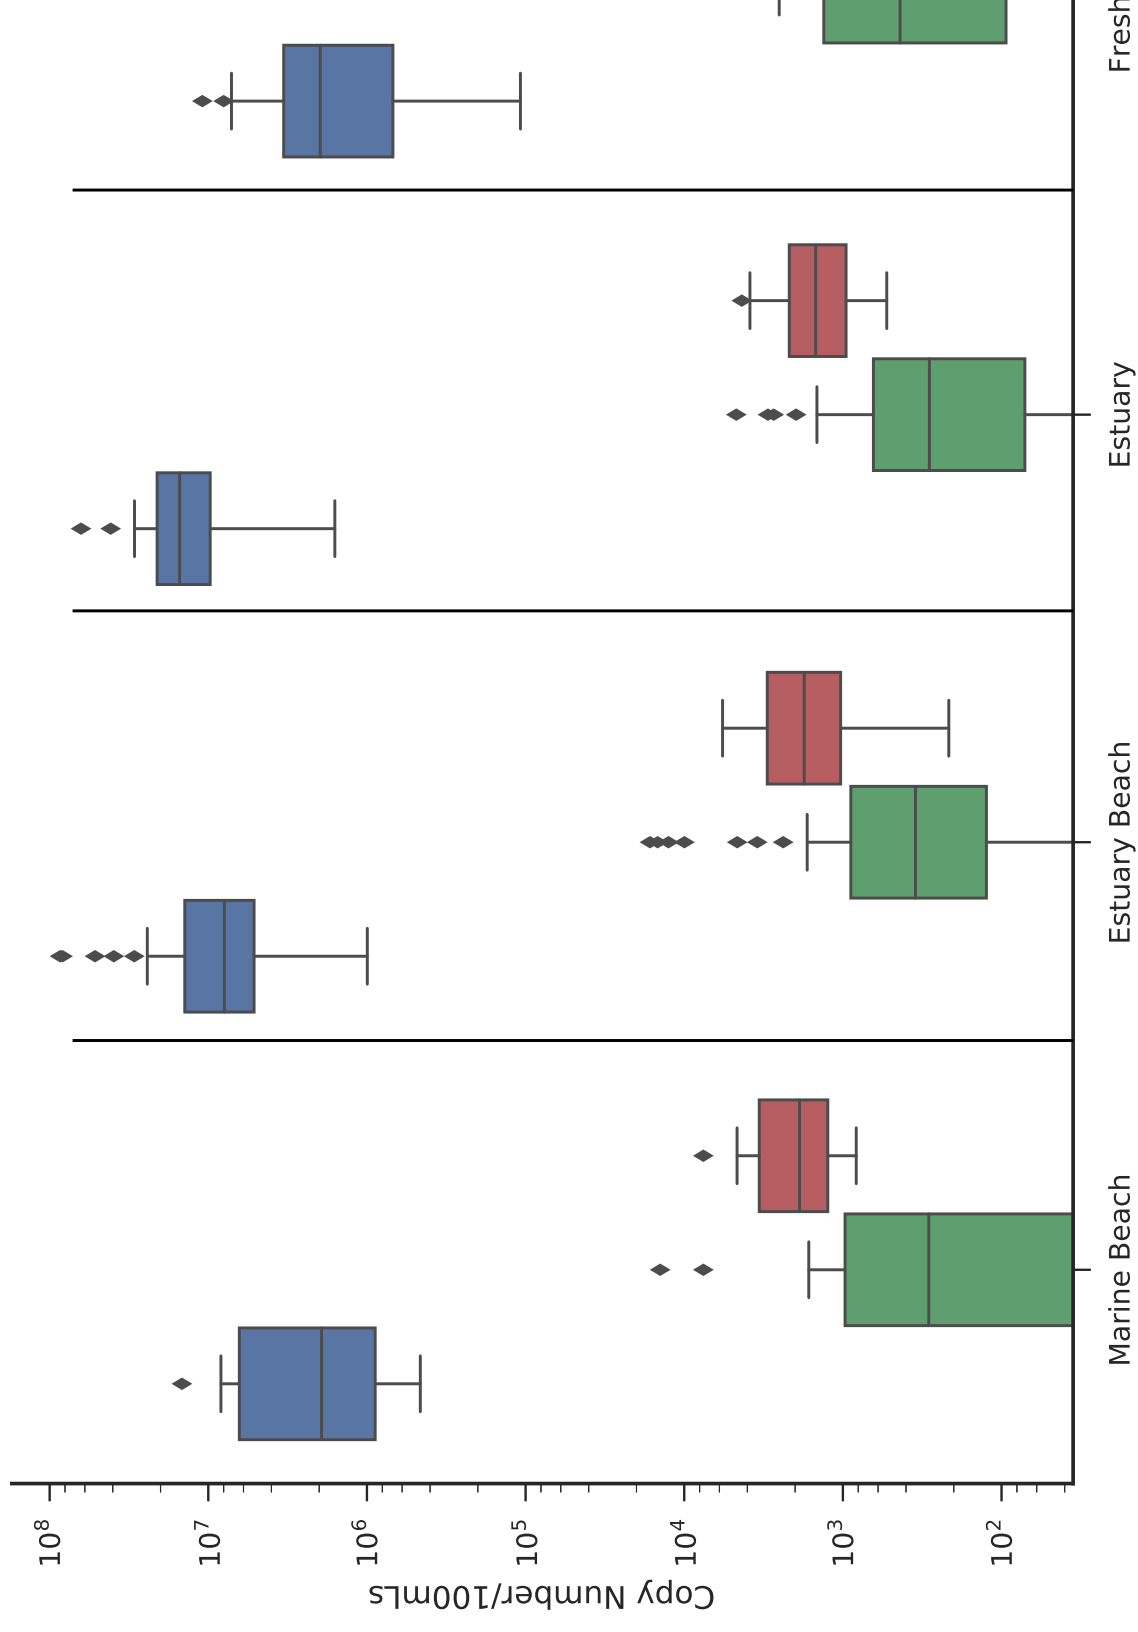

Figure 3: Relative Levels of Mammal, Human, and Bird Fecal Source at the Different Types of Study Sites. Box plot showing relative levels of mammal, human, and bird fecal source tracking markers at marine beach (Wells Beach), estuary beach (W11, W12, W13), estuary (W14, W15, W16, W17, W18, W19, W20, W21, W22, W23, W24, W25, W26, W27, W28, W29, W30, W31, W32, W33, W34, W35, W36, W37, W38, W39, W40, W41, W42, W43, W44, W45, W46, W47, W48, W49, W50, W51, W52, W53, W54, W55, W56, W57, W58, W59, W60, W61, W62, W63, W64, W65, W66, W67, W68, W69, W70, W71, W72, W73, W74, W75, W76, W77, W78, W79, W80, W81, W82, W83, W84, W85, W86, W87, W88, W89, W90, W91, W92, W93, W94, W95, W96, W97, W98, W99, W100), and fresh (W101, W102, W103, W104, W105, W106, W107, W108, W109, W110, W111, W112, W113, W114, W115, W116, W117, W118, W119, W120, W121, W122, W123, W124, W125, W126, W127, W128, W129, W130, W131, W132, W133, W134, W135, W136, W137, W138, W139, W140, W141, W142, W143, W144, W145, W146, W147, W148, W149, W150, W151, W152, W153, W154, W155, W156, W157, W158, W159, W160, W161, W162, W163, W164, W165, W166, W167, W168, W169, W170, W171, W172, W173, W174, W175, W176, W177, W178, W179, W180, W181, W182, W183, W184, W185, W186, W187, W188, W189, W190, W191, W192, W193, W194, W195, W196, W197, W198, W199, W200). Outlier data are represented with a black diamond.

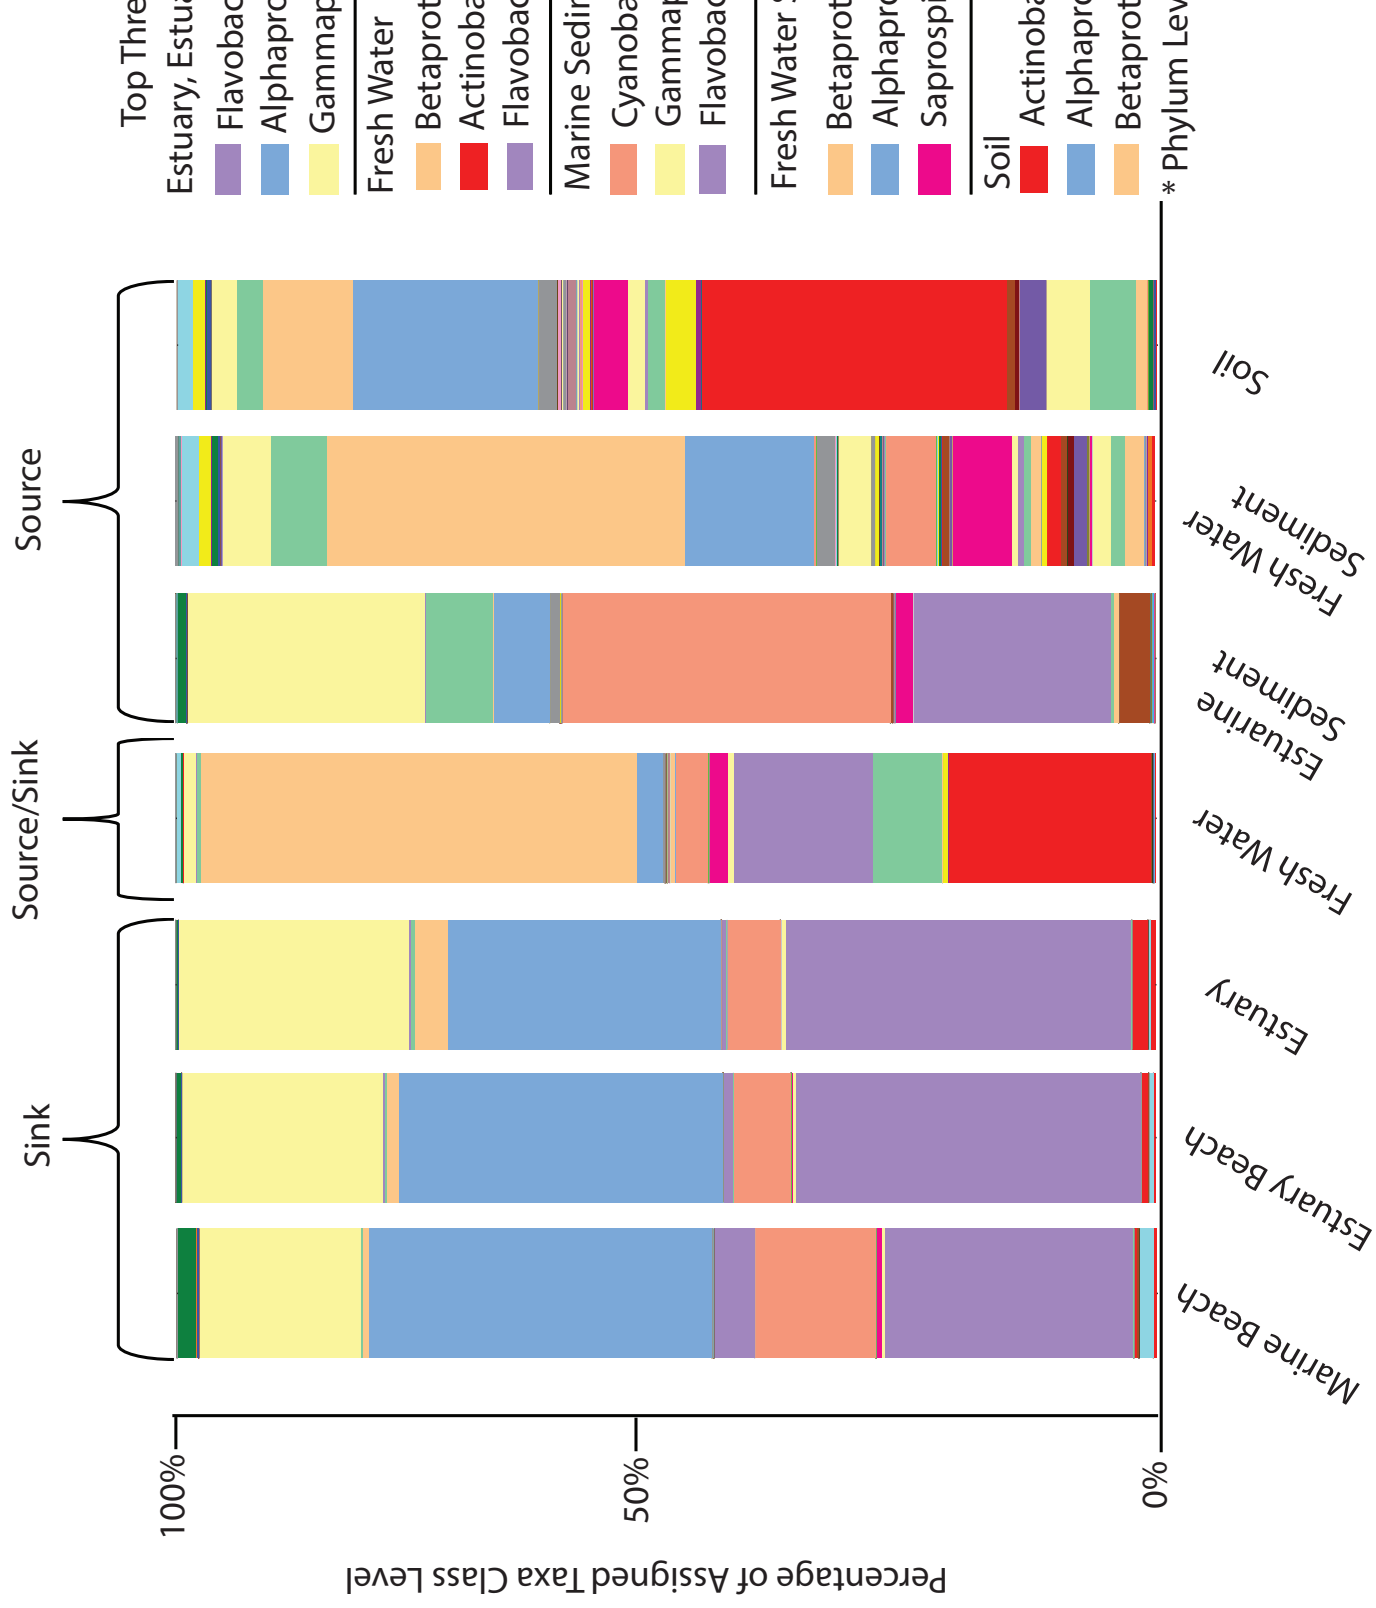

Figure 4: 16S Taxa Profiles and the Top Three Most Abundant Bacterial Classes in All Source and Sink Samples represent percentages of the class level composition of the microbial communities. Source corresponds to estuaries and Sink corresponds to beaches. The colors in the bars represent the presence within water samples of the top three classes for each group of samples and \* corresponds to phylum level. For a complete list of phyla and their corresponding colors, refer to Supplementary material 4.

# NMDS

Min Stress = 8.127  
(Monte Carlo – 250 runs)

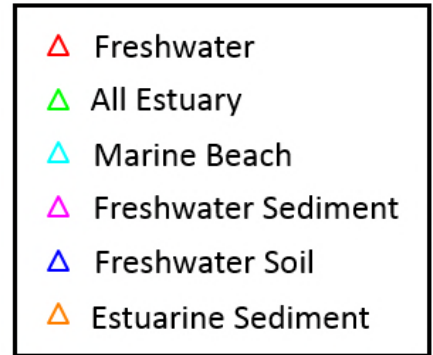

Axis 2 13.4%

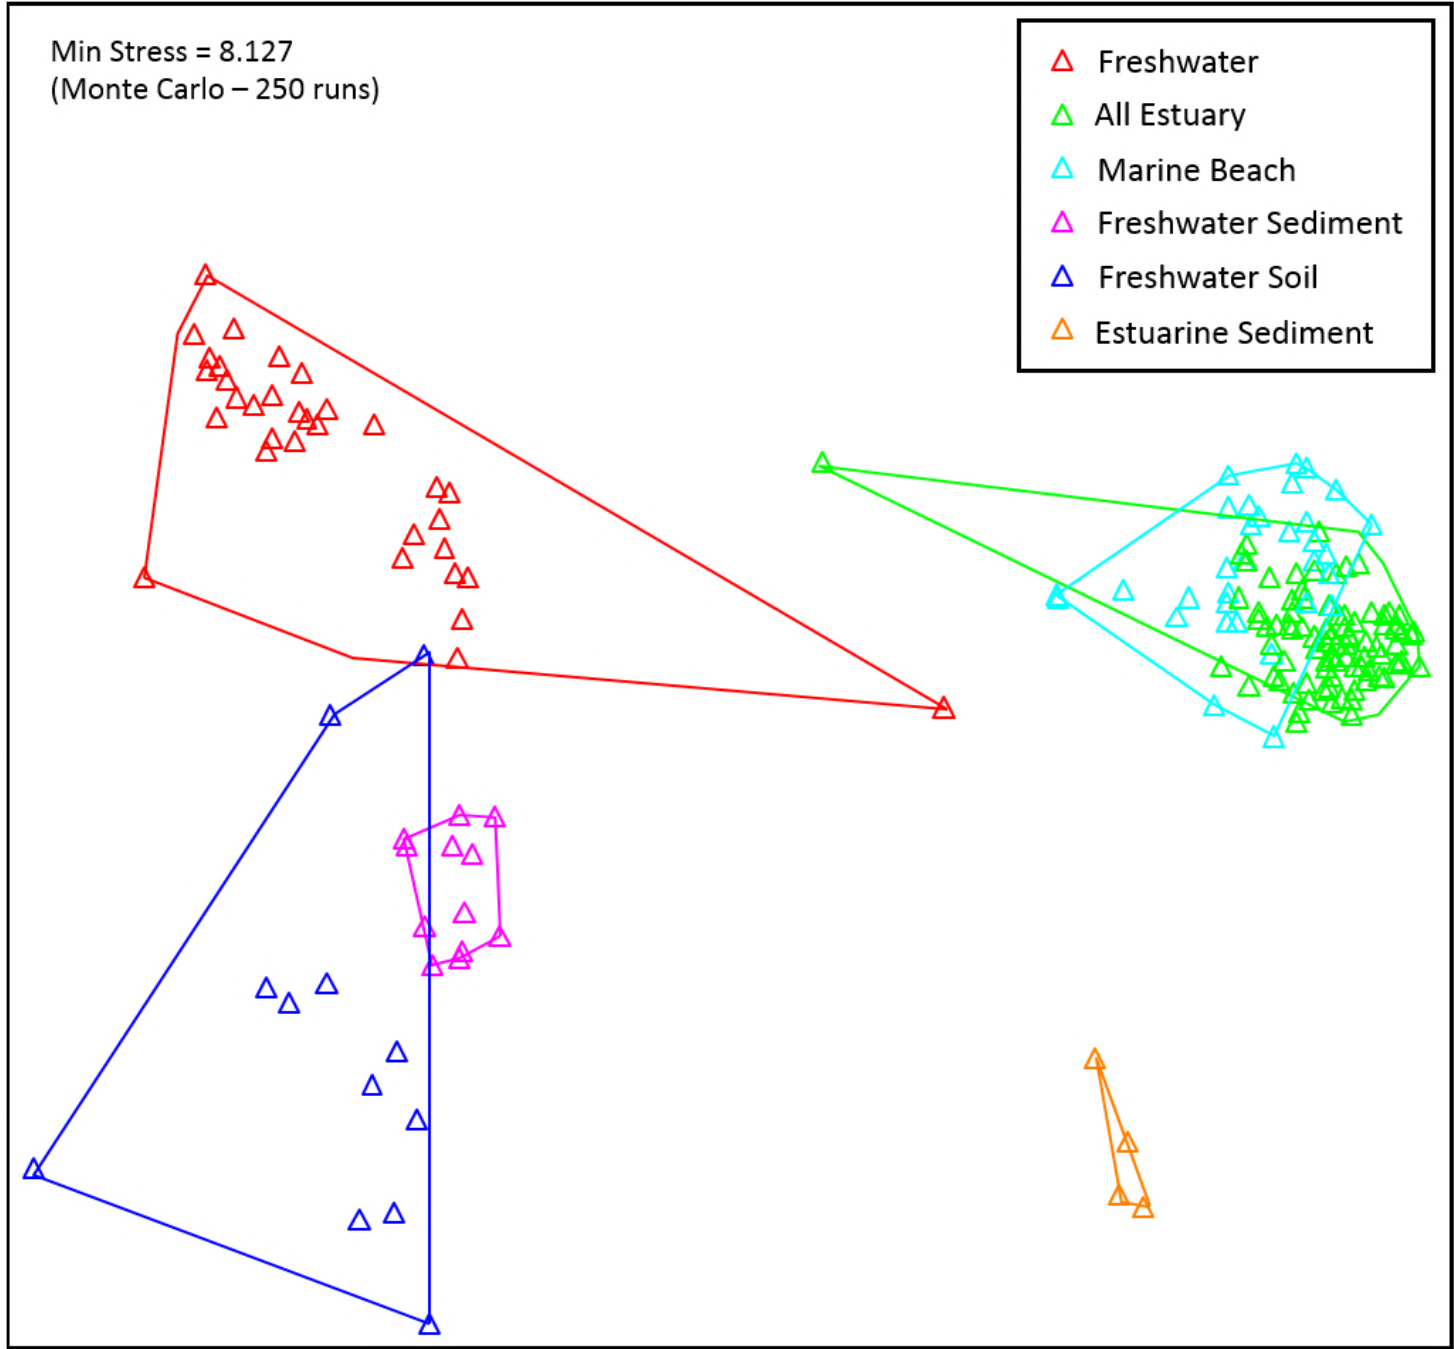

Axis 1 63.9%

Figure 5. Differences Between Microbial Communities from Different Source Materials. Samples are color-coded based on sample matrix (i.e. soil, fresh water, etc.). Percent of variation explained are displayed on the x and y axis and the minimum stress of the ordination is shown in the top left corner.
